# Supplementary material for: Structural and mechanistic insights into oxidative biaryl coupling to form the arylomycin core by an engineered CYP450
Source: Royal Society of Chemistry journal article supplement (doi:10.1039/d4dt02197e), 2024-11-05
Supplement: d4dt02197e1.pdf [file d4dt02197e1.pdf]

## Supporting Information

### **Structural and Mechanistic Insights into Oxidative Biaryl Coupling to form Arylomycin Core by an Engineered CYP450**

Vandana Kardam, Vaibhav Bhatt and Kshatresh Dutta Dubey\*

Department of Chemistry, School of Natural Sciences, Shiv Nadar Institution of Eminence, Delhi-NCR, NH91, Tehsil Dadri, Greater Noida, Uttar Pradesh 201314, India.

\*Corresponding author, email: [kshatresh.dubey@snu.edu.in](mailto:kshatresh.dubey@snu.edu.in), [kshatresh@gmail.com](mailto:kshatresh@gmail.com)

#### **Table of Contents**

|                                                                                                                    |                                      |
|--------------------------------------------------------------------------------------------------------------------|--------------------------------------|
| <b>Figure S1:</b> Distance plots of WT enzymes.....                                                                | S2                                   |
| <b>Figure S2:</b> Distance plots of Mutant enzyme.....                                                             | S2                                   |
| <b>Figure S3:</b> RMSD plots of WT and Mutant enzymes. ....                                                        | S2                                   |
| <b>Figure S4:</b> Active site residues of the mutant enzyme.....                                                   | S3                                   |
| <b>Table S1.</b> Spin density and charges over all the geometries obtained during mechanism of Mutant enzyme. .... | <b>SError! Bookmark not defined.</b> |
| <b>Table S2.</b> Mulliken charges for the substrate and Fe-OH.....                                                 | S4                                   |
| <b>QM Coordinates of all the geometries obtained in Wild type 1 and Variant 2</b> .....                            | S4-S38                               |

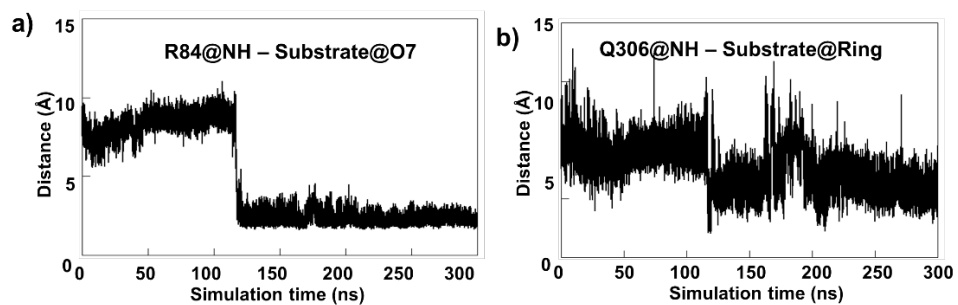

Figure S1: Distance plots of WT enzymes.

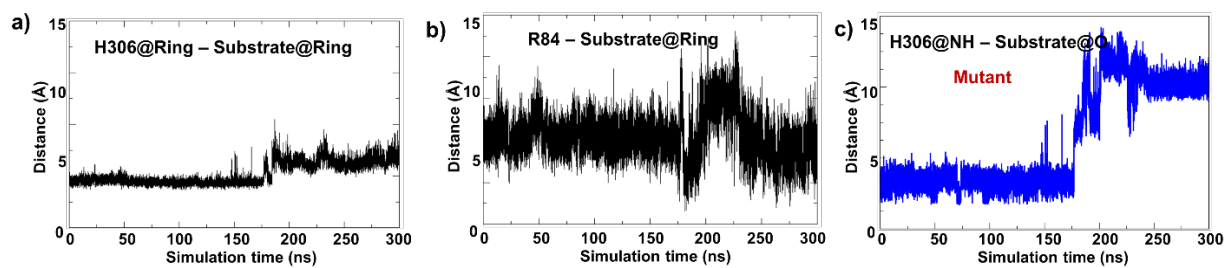

Figure S2: Distance plots of Mutant enzyme.

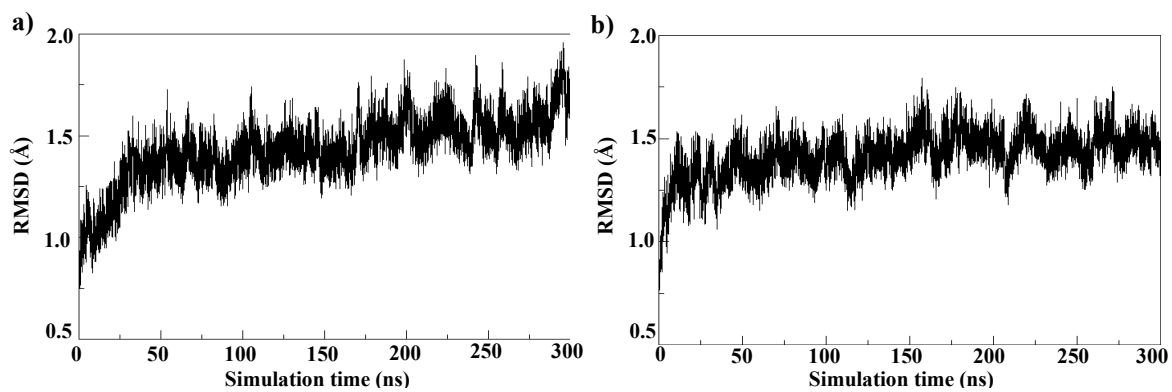

**Figure S3:** Root Mean Square Deviation (RMSD) plots for a) WT enzyme b) Mutant enzyme.

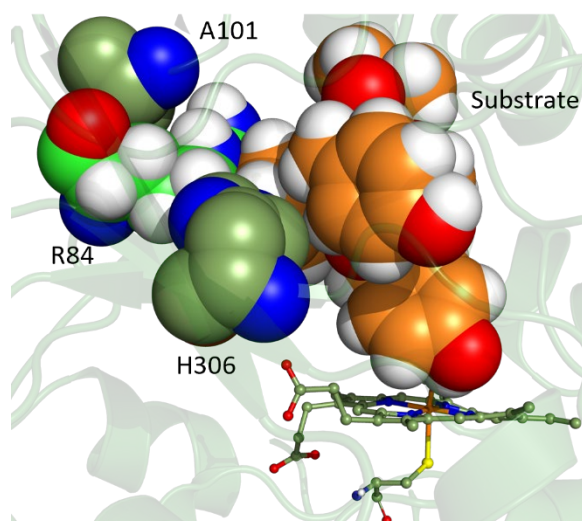

**Figure S4:** Active site residues as seen via their van der Waals' radii. As can be seen, A101 applies the steric kick to the substrate via the intermediary R84 residue.

**Table S1.** Spin density and charges over all the geometries obtained during mechanism of Mutant enzyme.

| Spin density | Fe-O | SH    | Por.  | Subs. |
|--------------|------|-------|-------|-------|
| RC           | 2.14 | -0.11 | -0.76 | -0.28 |
| IM1          | 2.19 | -0.05 | -0.18 | -0.99 |
| IM2          | 1.13 | -0.03 | -0.11 | 0.01  |
| PC           | 1.12 | -0.03 | -0.11 | 0     |
| PC'          | 1.32 | -0.11 | -0.26 | 0     |
|              |      |       |       |       |
| Charge       | Fe-O | SH    | Por.  | Subs. |
| RC           | 0.6  | -0.51 | 0.11  | 0.24  |
| IM1          | 0.51 | -0.36 | 0.08  | 0.09  |
| IM2          | 0.29 | -0.37 | 0     | 0.13  |
| PC           | 0.29 | -0.37 | -0.04 | 0.13  |
| PC'          | 0.28 | -0.33 | -0.07 | 0.03  |

**Table S2.** Mulliken charges (elementary charge unit e) for the substrate and Fe-OH. Atoms involved in the hydroxylation reaction are shown in bold.

|            |                 |
|------------|-----------------|
| <b>31o</b> | <b>-0.36992</b> |
| 32c        | -0.02007        |
| 33h        | 0.02008         |
| 34c        | 0.13480         |
| 35n        | -0.15490        |
| 36h        | 0.13059         |
| 37o        | -0.31722        |
| 38c        | 0.01550         |
| 39h        | 0.03420         |
| 40c        | 0.20425         |
| 41h        | 0.02370         |
| 42h        | 0.04728         |
| 43c        | -0.07816        |
| 44c        | 0.01180         |
| <b>45c</b> | <b>-0.03515</b> |
| 46h        | 0.02155         |
| 47c        | 0.18803         |
| 48h        | 0.00696         |
| 49c        | -0.00808        |
| 50c        | -0.00055        |
| 51h        | -0.01444        |
| 52h        | -0.00767        |

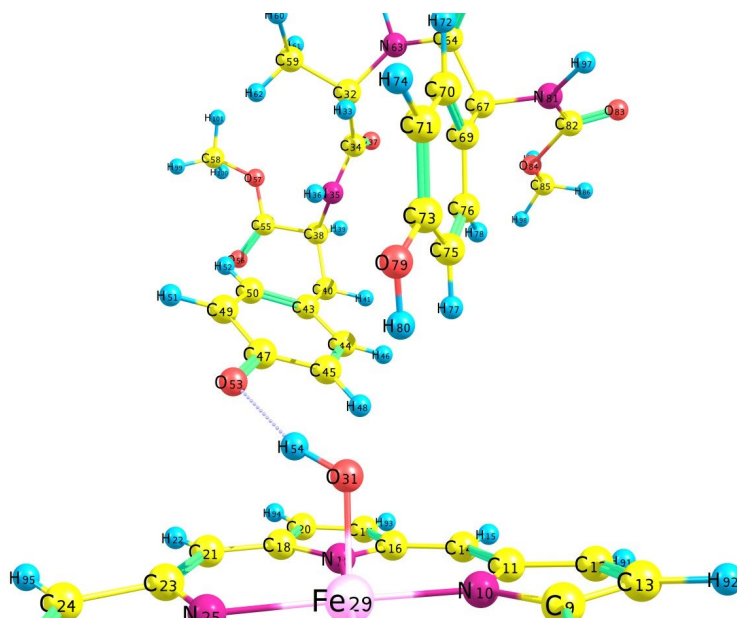

**QM Coordinates of all the geometries obtained in Wild type 1 and Variant 2**

|           |   |            |            |            |
|-----------|---|------------|------------|------------|
|           | C | 32.8139568 | 37.9956466 | 43.0911918 |
| <b>RC</b> | C | 32.4438950 | 38.6062346 | 44.3572405 |
| S         | C | 32.7798859 | 39.9327307 | 44.2628860 |
| N         | C | 32.7721089 | 36.6291391 | 42.8154604 |
| C         | H | 32.4096376 | 35.9721887 | 43.6100379 |
| C         | C | 33.1790517 | 36.0200039 | 41.6241719 |
| C         | C | 33.1642391 | 34.5945621 | 41.3789590 |
| C         | C | 34.1087946 | 35.7117700 | 39.6606906 |
| C         | N | 33.7251114 | 36.6817563 | 40.5551084 |
| H         | C | 33.7767392 | 34.3963274 | 40.1721786 |
| C         | C | 34.6982395 | 35.9515145 | 38.4233624 |
| N         | H | 34.9686399 | 35.0658835 | 37.8494392 |

|    |            |            |            |   |            |            |            |
|----|------------|------------|------------|---|------------|------------|------------|
| C  | 34.9045685 | 37.1971123 | 37.8125044 | C | 40.7174311 | 31.2237632 | 42.2637375 |
| C  | 35.3831474 | 37.3989052 | 36.4489166 | O | 40.1300410 | 30.7124592 | 41.3237114 |
| N  | 34.6023987 | 38.3788821 | 38.4075328 | O | 41.9997964 | 31.2490289 | 42.5007011 |
| C  | 34.8618686 | 39.3451942 | 37.4679069 | C | 43.0654191 | 30.4897700 | 41.7189434 |
| C  | 34.7209757 | 40.7010930 | 37.7181933 | C | 43.6025458 | 34.1196935 | 43.7773281 |
| H  | 34.9667433 | 41.3805483 | 36.9059335 | H | 44.2002608 | 35.0252026 | 43.5834081 |
| Fe | 34.0216199 | 38.6625339 | 40.3600822 | H | 44.2510247 | 33.3519315 | 44.2285942 |
| C  | 35.3253463 | 38.7513126 | 36.2089101 | H | 43.2205784 | 33.7184820 | 42.8294180 |
| O  | 35.5713157 | 38.5766439 | 40.9096351 | N | 42.9837366 | 34.9742567 | 45.9612457 |
| C  | 42.4308702 | 34.4405012 | 44.7181267 | C | 42.4456544 | 35.9715844 | 46.7355411 |
| H  | 41.8087485 | 35.2199241 | 44.2453215 | O | 43.1791700 | 36.7685158 | 47.3015581 |
| C  | 41.5651983 | 33.1641119 | 44.8454418 | H | 44.0004954 | 35.0430513 | 45.9662714 |
| N  | 40.6090006 | 33.1267233 | 43.8824081 | C | 40.9078632 | 36.0315672 | 46.8976126 |
| H  | 40.5303958 | 33.9385896 | 43.2780286 | H | 40.5296738 | 35.0073872 | 46.8083901 |
| O  | 41.7792257 | 32.2752642 | 45.6614118 | C | 40.2540637 | 36.8671650 | 45.7913703 |
| C  | 39.9270835 | 31.9343536 | 43.4072438 | C | 40.8995336 | 37.9442226 | 45.1551571 |
| H  | 39.9287334 | 31.2259582 | 44.2458035 | C | 40.2677884 | 38.6752931 | 44.1462368 |
| C  | 38.4606340 | 32.2087166 | 43.0294828 | H | 41.9184712 | 38.2158582 | 45.4446482 |
| H  | 37.8589571 | 32.2860085 | 43.9465295 | C | 38.9590051 | 38.3520112 | 43.7517212 |
| H  | 38.1209718 | 31.3142944 | 42.4856177 | H | 40.7798238 | 39.4965545 | 43.6395628 |
| C  | 38.2007721 | 33.4450508 | 42.1914289 | C | 38.2945549 | 37.3005348 | 44.4046434 |
| C  | 37.1513501 | 34.3139962 | 42.5317578 | C | 38.9409634 | 36.5644407 | 45.3961909 |
| C  | 36.8610370 | 35.4484607 | 41.7735721 | H | 37.2728902 | 37.0438560 | 44.1170110 |
| H  | 36.5407240 | 34.0931167 | 43.4124723 | H | 38.4112835 | 35.7364187 | 45.8749556 |
| C  | 37.6356014 | 35.7625946 | 40.6436105 | O | 38.4019130 | 39.0650858 | 42.7458943 |
| H  | 36.0356012 | 36.1080509 | 42.0496591 | H | 37.5163691 | 38.7367238 | 42.5222778 |
| C  | 38.7016642 | 34.9126646 | 40.2987330 | N | 40.5439268 | 36.4521272 | 48.2645814 |
| C  | 38.9668588 | 33.7715059 | 41.0537454 | C | 39.9769309 | 35.6109413 | 49.1986279 |
| H  | 39.3025779 | 35.1615841 | 39.4199661 | O | 39.8762125 | 35.8313405 | 50.3954069 |
| H  | 39.7711560 | 33.1010531 | 40.7449810 | O | 39.4793362 | 34.5017544 | 48.6169533 |
| O  | 37.3875975 | 36.8289914 | 39.8587233 | C | 38.9831994 | 33.4682085 | 49.4692748 |
| H  | 36.7201330 | 37.4391083 | 40.2611184 | H | 38.4226104 | 33.9042655 | 50.3072043 |

H 39.8094188 32.8556649 49.8614944  
H 30.9802012 37.7733269 39.5038908  
H 34.6296447 43.5176269 38.3733033  
H 33.6649563 43.9915629 40.7674684  
H 31.8822173 38.1158653 45.1523022  
H 32.7296074 40.6872514 45.0478941  
H 32.7551031 33.8195639 42.0270737  
H 34.0401710 33.4426845 39.7147553  
H 35.7865409 36.6053642 35.8199225  
H 35.5468842 39.3327806 35.3139894  
H 40.7614888 37.3781142 48.5731056  
H 38.3311585 32.8515877 48.8506566  
H 43.0441039 30.7458227 40.6596748  
H 42.9237354 29.4240354 41.8983942  
H 44.0014204 30.8129494 42.1744912

**TS1**

S 31.7149072 38.9608313 39.4667787  
N 34.0350199 40.6688451 40.0678664  
C 34.4031471 41.3041170 38.9209700  
C 33.7656417 41.6466014 40.9995255  
C 34.3802821 42.7377274 39.1187509  
C 33.9257158 42.9652397 40.3975539  
C 33.5179878 41.3630384 42.3403057  
H 33.5013625 42.2024784 43.0316482  
C 33.2803285 40.1082008 42.9040207  
N 33.3001594 38.9225328 42.2235815  
C 32.8339504 37.9691350 43.0941402  
C 32.4597695 38.5841575 44.3572760  
C 32.8004210 39.9095596 44.2637968  
C 32.7713759 36.6059838 42.8175155  
H 32.3945842 35.9525842 43.6072477

C 33.1765081 36.0002924 41.6268862  
C 33.1597142 34.5765435 41.3782224  
C 34.1115564 35.6890085 39.6564438  
N 33.7304435 36.6561170 40.5553517  
C 33.7749434 34.3763511 40.1713252  
C 34.7028994 35.9229328 38.4200610  
H 34.9643464 35.0374013 37.8426359  
C 34.9124753 37.1682005 37.8167238  
C 35.3883159 37.3733383 36.4517494  
N 34.6152345 38.3544201 38.4100067  
C 34.8702851 39.3227132 37.4717751  
C 34.7319623 40.6791126 37.7154222  
H 34.9783910 41.3585454 36.9040102  
Fe 34.0202188 38.6343434 40.3576924  
C 35.3293855 38.7255131 36.2115192  
O 35.6166686 38.5017737 40.9148883  
C 42.4424079 34.4536849 44.7140223  
H 41.8348927 35.2426371 44.2376344  
C 41.5579650 33.1898782 44.8283073  
N 40.6005819 33.1760876 43.8608275  
H 40.5599667 33.9878998 43.2534039  
O 41.7516650 32.2914129 45.6364316  
C 39.9164201 31.9914979 43.3710433  
H 39.9281612 31.2708684 44.1989783  
C 38.4399114 32.2566639 43.0156338  
H 37.8374606 32.2776726 43.9345246  
H 38.1190665 31.3809482 42.4272865  
C 38.1378530 33.5064926 42.2253510  
C 37.0585266 34.3349658 42.6079327  
C 36.7257901 35.4753429 41.8966564  
H 36.4699714 34.0625669 43.4889466  
C 37.4845384 35.8593556 40.7474021

H 35.8850808 36.1034341 42.1954755  
C 38.5875811 35.0307464 40.3676646  
C 38.8898167 33.8860151 41.0814119  
H 39.1647812 35.3247578 39.4871442  
H 39.7049856 33.2391053 40.7511558  
O 37.1996052 36.9014859 40.0279629  
H 36.4056711 37.6459583 40.4430620  
C 40.7015589 31.2995891 42.2121637  
O 40.1111940 30.8378944 41.2475735  
O 41.9774300 31.2851161 42.4705382  
C 43.0456053 30.5104784 41.7017438  
C 43.6186229 34.1222375 43.7826058  
H 44.2257237 35.0225360 43.5941588  
H 44.2570456 33.3483065 44.2373778  
H 43.2412462 33.7260467 42.8307178  
N 42.9865871 34.9749230 45.9648120  
C 42.4440360 35.9750673 46.7352099  
O 43.1759093 36.7706438 47.3035007  
H 44.0033954 35.0442288 45.9761701  
C 40.9052940 36.0362307 46.8914218  
H 40.5269706 35.0118223 46.8028442  
C 40.2536806 36.8713507 45.7824664  
C 40.9058352 37.9382259 45.1351932  
C 40.2743236 38.6721336 44.1282823  
H 41.9290545 38.2019490 45.4169091  
C 38.9564636 38.3658103 43.7477176  
H 40.7911039 39.4869416 43.6159761  
C 38.2849691 37.3264545 44.4140503  
C 38.9329169 36.5843821 45.4008670  
H 37.2525907 37.0909696 44.1468832  
H 38.3960597 35.7676861 45.8912079  
O 38.4022768 39.0801619 42.7435091

H 37.4945697 38.7945339 42.5477093  
N 40.5385755 36.4580317 48.2567286  
C 39.9759675 35.6153391 49.1930832  
O 39.8780312 35.8357875 50.3895146  
O 39.4795288 34.5047323 48.6128007  
C 38.9795422 33.4748462 49.4679950  
H 38.4164195 33.9146402 50.3022060  
H 39.8038249 32.8630574 49.8654018  
H 31.0168333 37.7715970 39.5193337  
H 34.6448626 43.4881313 38.3737956  
H 33.7023703 43.9644288 40.7714593  
H 31.8932366 38.0965202 45.1505714  
H 32.7411514 40.6661896 45.0461428  
H 32.7534251 33.8015944 42.0281841  
H 34.0337390 33.4217250 39.7133066  
H 35.7875599 36.5804019 35.8193546  
H 35.5457485 39.3064017 35.3149577  
H 40.7544274 37.3846872 48.5644459  
H 38.3286541 32.8568089 48.8495762  
H 43.0386375 30.7597745 40.6406736  
H 42.8841552 29.4486905 41.8877744  
H 43.9798018 30.8229820 42.1683116

**IM1**

S 31.7285525 38.9445052 39.4462681  
N 33.9649473 40.6880235 40.0658608  
C 34.3659101 41.3178354 38.9196825  
C 33.7007532 41.6680377 40.9958243  
C 34.3537022 42.7499207 39.1203719  
C 33.8836514 42.9823754 40.3930409  
C 33.4463328 41.3942061 42.3378101  
H 33.4280774 42.2349155 43.0268084

|    |            |            |            |   |            |            |            |
|----|------------|------------|------------|---|------------|------------|------------|
| C  | 33.2289095 | 40.1411158 | 42.9017056 | H | 37.8569113 | 32.2923778 | 43.9398333 |
| N  | 33.2604081 | 38.9468498 | 42.2267901 | H | 38.1367200 | 31.3361360 | 42.4677388 |
| C  | 32.8179244 | 37.9891869 | 43.1062071 | C | 38.1974044 | 33.4489606 | 42.1858011 |
| C  | 32.4451207 | 38.6062510 | 44.3663321 | C | 37.1181852 | 34.3082391 | 42.5184566 |
| C  | 32.7683149 | 39.9362883 | 44.2654777 | C | 36.8438800 | 35.4394958 | 41.7817434 |
| C  | 32.7731771 | 36.6230815 | 42.8450687 | H | 36.4982710 | 34.0619270 | 43.3851412 |
| H  | 32.4107986 | 35.9704006 | 43.6412835 | C | 37.6627542 | 35.8039216 | 40.6405683 |
| C  | 33.1772661 | 36.0211738 | 41.6587187 | H | 36.0142413 | 36.1028818 | 42.0325175 |
| C  | 33.1622314 | 34.5984709 | 41.4102360 | C | 38.7572248 | 34.9097799 | 40.3103697 |
| C  | 34.0882819 | 35.7066867 | 39.6705552 | C | 38.9978696 | 33.7756626 | 41.0522327 |
| N  | 33.7181598 | 36.6766689 | 40.5728190 | H | 39.3665208 | 35.1719806 | 39.4414759 |
| C  | 33.7589825 | 34.3976528 | 40.1941603 | H | 39.7974458 | 33.0910898 | 40.7653436 |
| C  | 34.6639549 | 35.9292739 | 38.4252604 | O | 37.4395156 | 36.8354639 | 39.9547453 |
| H  | 34.9041687 | 35.0427128 | 37.8410943 | H | 36.2264232 | 38.0192747 | 40.4642645 |
| C  | 34.8980154 | 37.1695053 | 37.8393917 | C | 40.7220822 | 31.2506009 | 42.2512843 |
| C  | 35.3762989 | 37.3784389 | 36.4791359 | O | 40.1268109 | 30.7645028 | 41.3016576 |
| N  | 34.6218988 | 38.3669055 | 38.4404103 | O | 42.0000653 | 31.2557391 | 42.4949012 |
| C  | 34.8735678 | 39.3329573 | 37.4995071 | C | 43.0648588 | 30.4922022 | 41.7105592 |
| C  | 34.7217184 | 40.6932196 | 37.7292375 | C | 43.6319726 | 34.1236853 | 43.7916329 |
| H  | 34.9856819 | 41.3676253 | 36.9197559 | H | 44.2384513 | 35.0239251 | 43.6010359 |
| Fe | 33.9561562 | 38.6581605 | 40.3614631 | H | 44.2691498 | 33.3538489 | 44.2550900 |
| C  | 35.3282881 | 38.7325135 | 36.2418545 | H | 43.2614642 | 33.7213979 | 42.8395071 |
| O  | 35.6226457 | 38.6083990 | 40.9910410 | N | 42.9832394 | 34.9981916 | 45.9609772 |
| C  | 42.4492324 | 34.4590739 | 44.7136799 | C | 42.4295422 | 36.0027794 | 46.7185693 |
| H  | 41.8382368 | 35.2380720 | 44.2250803 | O | 43.1535205 | 36.8114465 | 47.2785620 |
| C  | 41.5727201 | 33.1907005 | 44.8384798 | H | 43.9992852 | 35.0766206 | 45.9750353 |
| N  | 40.6200108 | 33.1590624 | 43.8663844 | C | 40.8895794 | 36.0494402 | 46.8747736 |
| H  | 40.5862695 | 33.9592519 | 43.2434138 | H | 40.5219792 | 35.0206422 | 46.7917733 |
| O  | 41.7658025 | 32.3019020 | 45.6568512 | C | 40.2242458 | 36.8735660 | 45.7648772 |
| C  | 39.9385917 | 31.9642134 | 43.3976432 | C | 40.8640590 | 37.9409444 | 45.1060547 |
| H  | 39.9425722 | 31.2621170 | 44.2412136 | C | 40.2167499 | 38.6696755 | 44.1055734 |
| C  | 38.4659776 | 32.2276618 | 43.0273523 | H | 41.8892514 | 38.2106331 | 45.3749048 |



|            |            |            |            |    |            |            |            |
|------------|------------|------------|------------|----|------------|------------|------------|
| C          | 38.8944194 | 38.3596030 | 43.7413306 | N  | 34.1346245 | 40.6708632 | 40.1900120 |
| H          | 40.7233990 | 39.4862639 | 43.5859407 | C  | 34.4893337 | 41.3002524 | 39.0290207 |
| C          | 38.2367627 | 37.3159034 | 44.4161803 | C  | 33.8138339 | 41.6532777 | 41.0976534 |
| C          | 38.9004494 | 36.5795334 | 45.3977095 | C  | 34.4195744 | 42.7330792 | 39.2064642 |
| H          | 37.2009626 | 37.0767535 | 44.1637459 | C  | 33.9394217 | 42.9650409 | 40.4762899 |
| H          | 38.3719624 | 35.7631920 | 45.8978255 | C  | 33.5516371 | 41.3808611 | 42.4421408 |
| O          | 38.3273286 | 39.0759586 | 42.7478973 | H  | 33.4996386 | 42.2290080 | 43.1208781 |
| H          | 37.4154004 | 38.7969849 | 42.5565464 | C  | 33.3349212 | 40.1295975 | 43.0145189 |
| N          | 40.5229309 | 36.4721223 | 48.2403032 | N  | 33.4056853 | 38.9305830 | 42.3484216 |
| C          | 39.9701343 | 35.6275770 | 49.1809734 | C  | 32.9177148 | 37.9794448 | 43.2098040 |
| O          | 39.8760716 | 35.8494527 | 50.3774708 | C  | 32.4984772 | 38.5996135 | 44.4534614 |
| O          | 39.4787175 | 34.5124137 | 48.6048232 | C  | 32.8216529 | 39.9311296 | 44.3590496 |
| C          | 38.9859675 | 33.4824774 | 49.4640174 | C  | 32.8581049 | 36.6126517 | 42.9368743 |
| H          | 38.4251375 | 33.9217926 | 50.3000719 | H  | 32.4703298 | 35.9639630 | 43.7249983 |
| H          | 39.8139431 | 32.8740189 | 49.8587834 | C  | 33.2525164 | 36.0036791 | 41.7477382 |
| H          | 31.0298631 | 37.7561034 | 39.5085706 | C  | 33.1916235 | 34.5838370 | 41.4840853 |
| H          | 34.6392664 | 43.4984159 | 38.3812676 | C  | 34.1485334 | 35.6849879 | 39.7588622 |
| H          | 33.6702482 | 43.9841523 | 40.7658267 | N  | 33.8163707 | 36.6540137 | 40.6737745 |
| H          | 31.8859937 | 38.1141306 | 45.1621094 | C  | 33.7778851 | 34.3789758 | 40.2635296 |
| H          | 32.7162147 | 40.6915595 | 45.0496449 | C  | 34.7316793 | 35.9096346 | 38.5137478 |
| H          | 32.7608101 | 33.8216686 | 42.0610097 | H  | 34.9372813 | 35.0226480 | 37.9156563 |
| H          | 34.0162101 | 33.4423461 | 39.7366779 | C  | 34.9916386 | 37.1484081 | 37.9295112 |
| H          | 35.7718049 | 36.5835582 | 35.8468331 | C  | 35.4262375 | 37.3525838 | 36.5538659 |
| H          | 35.5488020 | 39.3100355 | 35.3441301 | N  | 34.7640788 | 38.3464955 | 38.5478986 |
| H          | 40.7310303 | 37.4017016 | 48.5445224 | C  | 34.9814201 | 39.3079177 | 37.5957370 |
| H          | 38.3342310 | 32.8614954 | 48.8494542 | C  | 34.8273496 | 40.6691879 | 37.8337762 |
| H          | 43.0455011 | 30.7519543 | 40.6521542 | H  | 35.0455068 | 41.3437528 | 37.0099879 |
| H          | 42.9111199 | 29.4277975 | 41.8879688 | Fe | 34.1484504 | 38.6390761 | 40.4964491 |
| H          | 44.0011551 | 30.8077334 | 42.1708379 | C  | 35.3849643 | 38.7083972 | 36.3205482 |
|            |            |            |            | O  | 36.0193800 | 38.4611354 | 41.2145816 |
|            |            |            |            | C  | 42.3870402 | 34.5662976 | 44.6556404 |
|            |            |            |            | H  | 41.7586327 | 35.2902977 | 44.1073297 |
| <b>TS2</b> |            |            |            |    |            |            |            |
| S          | 31.7168167 | 38.9453718 | 39.4621049 |    |            |            |            |

|   |            |            |            |   |            |            |            |
|---|------------|------------|------------|---|------------|------------|------------|
| C | 41.5638515 | 33.2653954 | 44.8291484 | H | 43.8796840 | 35.3061508 | 45.9207165 |
| N | 40.6340145 | 33.1433597 | 43.8443238 | C | 40.7137979 | 36.1713501 | 46.7483276 |
| H | 40.5715153 | 33.9094467 | 43.1820656 | H | 40.4028240 | 35.1225057 | 46.6780393 |
| O | 41.7843413 | 32.4247896 | 45.6898309 | C | 39.9763884 | 36.9421069 | 45.6405034 |
| C | 39.9805994 | 31.9091831 | 43.4413538 | C | 40.5257532 | 38.0549665 | 44.9641835 |
| H | 39.9793556 | 31.2610983 | 44.3276422 | C | 39.8086835 | 38.7317582 | 43.9821324 |
| C | 38.5151411 | 32.1392002 | 43.0215686 | H | 41.5356178 | 38.3946812 | 45.2131377 |
| H | 37.8821607 | 32.2568631 | 43.9125248 | C | 38.4774181 | 38.3469283 | 43.6249669 |
| H | 38.2046911 | 31.2167441 | 42.5043392 | H | 40.2438533 | 39.5844127 | 43.4551520 |
| C | 38.2858591 | 33.3168301 | 42.1075397 | C | 37.9214847 | 37.2377650 | 44.3325947 |
| C | 37.2285278 | 34.2222772 | 42.3753597 | C | 38.6606068 | 36.5571685 | 45.2936611 |
| C | 37.0217275 | 35.3395534 | 41.5951029 | H | 36.8978312 | 36.9317130 | 44.1093946 |
| H | 36.5782184 | 34.0309350 | 43.2335349 | H | 38.2031776 | 35.7075125 | 45.8090551 |
| C | 37.8888841 | 35.6367800 | 40.4686507 | O | 37.8539638 | 39.0272548 | 42.7036932 |
| H | 36.2287072 | 36.0587050 | 41.8035400 | H | 36.9117374 | 38.7155247 | 42.1317374 |
| C | 38.9542413 | 34.6888258 | 40.1995303 | N | 40.3370906 | 36.5813393 | 48.1171604 |
| C | 39.1284789 | 33.5717175 | 40.9846019 | C | 39.8737082 | 35.7051576 | 49.0812532 |
| H | 39.5998659 | 34.9003671 | 39.3430382 | O | 39.8095738 | 35.9265240 | 50.2794201 |
| H | 39.9107695 | 32.8502148 | 40.7452269 | O | 39.4373330 | 34.5587518 | 48.5242845 |
| O | 37.7294250 | 36.6592348 | 39.7546815 | C | 39.0007473 | 33.5162079 | 49.4000605 |
| H | 36.5667211 | 37.9855744 | 40.5542498 | H | 38.4565213 | 33.9407605 | 50.2547146 |
| C | 40.7796578 | 31.1443262 | 42.3392562 | H | 39.8573520 | 32.9308658 | 49.7670652 |
| O | 40.1907970 | 30.5968015 | 41.4202917 | H | 31.0460877 | 37.7420377 | 39.5424598 |
| O | 42.0595731 | 31.1901463 | 42.5677188 | H | 34.6765930 | 43.4789956 | 38.4543888 |
| C | 43.1262434 | 30.4515331 | 41.7627962 | H | 33.6786135 | 43.9622724 | 40.8306564 |
| C | 43.6067075 | 34.2210337 | 43.7855324 | H | 31.9121219 | 38.1126374 | 45.2326333 |
| H | 44.2018875 | 35.1242235 | 43.5748810 | H | 32.7303460 | 40.6908260 | 45.1353172 |
| H | 44.2435812 | 33.4850230 | 44.3014799 | H | 32.7789860 | 33.8100754 | 42.1314572 |
| H | 43.2749239 | 33.7712682 | 42.8401591 | H | 34.0101250 | 33.4227493 | 39.7947412 |
| N | 42.8676169 | 35.1982117 | 45.8806902 | H | 35.7897678 | 36.5538717 | 35.9073585 |
| C | 42.2623510 | 36.1963355 | 46.6041069 | H | 35.5818034 | 39.2867136 | 35.4178458 |
| O | 42.9460812 | 37.0391902 | 47.1689852 | H | 40.5022884 | 37.5212052 | 48.4160484 |

H 38.3453119 32.8798104 48.8055273  
H 43.0781678 30.7088580 40.7047131  
H 43.0134551 29.3821458 41.9410009  
H 44.0616023 30.8026386 42.1985664

**IM2**

S 31.4928206 38.9543651 39.2893929  
N 33.9545466 40.7308394 40.0362260  
C 34.3627417 41.3585349 38.8919524  
C 33.6673236 41.7121218 40.9576389  
C 34.3398088 42.7917590 39.0873376  
C 33.8481861 43.0261789 40.3527857  
C 33.3977520 41.4382500 42.2994097  
H 33.3539315 42.2825228 42.9833042  
C 33.1904574 40.1849048 42.8720374  
N 33.2529573 38.9861281 42.2041439  
C 32.8035906 38.0291670 43.0831035  
C 32.4149048 38.6466900 44.3386126  
C 32.7210205 39.9815466 44.2331691  
C 32.7635647 36.6608782 42.8227284  
H 32.3996852 36.0103987 43.6202020  
C 33.1676722 36.0516943 41.6374544  
C 33.1613837 34.6259809 41.3987070  
C 34.0684723 35.7350664 39.6484257  
N 33.6982729 36.7064633 40.5484368  
C 33.7520516 34.4239730 40.1785643  
C 34.6444586 35.9624489 38.4014134  
H 34.8842375 35.0756846 37.8166903  
C 34.8777488 37.2035009 37.8097748  
C 35.3636463 37.4075852 36.4497896  
N 34.6042987 38.4023824 38.4081696  
C 34.8687251 39.3653034 37.4690361

C 34.7292744 40.7284098 37.7042710  
H 35.0032928 41.4022307 36.8968894  
Fe 33.8082114 38.7045627 40.2799921  
C 35.3252755 38.7622696 36.2117026  
O 35.9781613 38.6050282 40.9761996  
C 42.4909013 34.4619352 44.6942852  
H 41.8870646 35.2346175 44.1850928  
C 41.6049571 33.2014216 44.8436017  
N 40.6702003 33.1392182 43.8579887  
H 40.6686111 33.9016362 43.1882019  
O 41.7773032 32.3470327 45.7016852  
C 39.9825923 31.9313455 43.4267660  
H 39.9719878 31.2616101 44.2965073  
C 38.5178327 32.1970819 43.0266163  
H 37.8975316 32.3082673 43.9274214  
H 38.1838295 31.2865762 42.5020932  
C 38.2838617 33.3878892 42.1305572  
C 37.2128974 34.2786739 42.4043349  
C 36.9904757 35.3994179 41.6325347  
H 36.5565148 34.0652303 43.2528931  
C 37.8585815 35.7154067 40.5120912  
H 36.1755570 36.0959317 41.8379633  
C 38.9276332 34.7763238 40.2276979  
C 39.1187545 33.6575710 41.0068278  
H 39.5640602 34.9978359 39.3669623  
H 39.9051872 32.9441061 40.7566063  
O 37.7046588 36.7505146 39.8153123  
H 36.5869384 38.0305861 40.4591129  
C 40.7699843 31.1764203 42.3093255  
O 40.1726983 30.6501855 41.3847468  
O 42.0510628 31.2041642 42.5404782  
C 43.1112519 30.4410477 41.7459536

C 43.6761268 34.1058246 43.7839164  
H 44.2932877 34.9975984 43.5873601  
H 44.3021372 33.3339901 44.2585880  
H 43.3067670 33.6985974 42.8336084  
N 43.0252919 35.0222640 45.9348811  
C 42.4563880 36.0035668 46.7053170  
O 43.1548122 36.8439043 47.2500576  
H 44.0394250 35.1258989 45.9355061  
C 40.9182838 35.9891742 46.8992253  
H 40.5860796 34.9467957 46.8309504  
C 40.1840221 36.7843884 45.8165683  
C 40.7632930 37.9091812 45.1710314  
C 40.0543004 38.6296308 44.2291730  
H 41.7838901 38.2072407 45.4263986  
C 38.6900778 38.2639201 43.8738714  
H 40.4875419 39.4903760 43.7134461  
C 38.1185971 37.1200733 44.5694983  
C 38.8526190 36.4089976 45.4917121  
H 37.0892351 36.8472867 44.3300239  
H 38.4075686 35.5496657 46.0003277  
O 38.0532275 38.9008968 43.0023699  
H 36.4566750 38.8001436 41.8025722  
N 40.5455964 36.4200300 48.2565501  
C 39.9695269 35.5747533 49.1916779  
O 39.8756794 35.7986581 50.3850820  
O 39.4693818 34.4729371 48.6062747  
C 38.9653563 33.4392841 49.4610821  
H 38.3970199 33.8812181 50.2900764  
H 39.7906065 32.8312610 49.8609585  
H 30.8636439 37.7336222 39.4245614  
H 34.6326603 43.5401946 38.3510297  
H 33.6183459 44.0277390 40.7162660

H 31.8617377 38.1505736 45.1360722  
H 32.6573354 40.7390321 45.0143395  
H 32.7638640 33.8500102 42.0528590  
H 34.0105769 33.4671649 39.7249675  
H 35.7553078 36.6096560 35.8189352  
H 35.5478543 39.3387439 35.3138144  
H 40.7518855 37.3476073 48.5680264  
H 38.3185074 32.8208950 48.8387890  
H 43.0727640 30.6917876 40.6858992  
H 42.9747240 29.3760194 41.9334153  
H 44.0523323 30.7724825 42.1847997

### TS3

S 31.5108066 38.9781270 39.3145970  
N 33.9127556 40.8003116 40.0606792  
C 34.3383927 41.4244965 38.9234668  
C 33.6070559 41.7826219 40.9730039  
C 34.3104266 42.8582766 39.1124375  
C 33.7949100 43.0958810 40.3673721  
C 33.3204296 41.5105592 42.3125854  
H 33.2594955 42.3576551 42.9917906  
C 33.1231018 40.2587360 42.8925011  
N 33.2083780 39.0560053 42.2340691  
C 32.7822982 38.0977879 43.1194732  
C 32.3742614 38.7165252 44.3678276  
C 32.6550065 40.0561943 44.2536663  
C 32.7879950 36.7246679 42.8720930  
H 32.4298831 36.0717857 43.6704256  
C 33.2288897 36.1143858 41.7006035  
C 33.2433790 34.6869219 41.4676090  
C 34.1522862 35.8008410 39.7225809  
N 33.7647455 36.7721496 40.6145387

|    |            |            |            |   |            |            |            |
|----|------------|------------|------------|---|------------|------------|------------|
| C  | 33.8453847 | 34.4878684 | 40.2523326 | H | 39.6392402 | 33.1349098 | 40.9132872 |
| C  | 34.7206517 | 36.0279639 | 38.4710451 | O | 38.1261381 | 37.3691426 | 41.1864739 |
| H  | 34.9589773 | 35.1397373 | 37.8865216 | H | 36.6763384 | 38.4034669 | 41.0096952 |
| C  | 34.9314501 | 37.2693022 | 37.8706070 | C | 40.7372475 | 31.1908595 | 42.3367759 |
| C  | 35.3988078 | 37.4716937 | 36.5044632 | O | 40.1351431 | 30.7611174 | 41.3648325 |
| N  | 34.6477754 | 38.4680415 | 38.4670006 | O | 42.0173795 | 31.1799480 | 42.5714927 |
| C  | 34.8863575 | 39.4284424 | 37.5167770 | C | 43.0758683 | 30.4544615 | 41.7385497 |
| C  | 34.7227436 | 40.7904241 | 37.7430024 | C | 43.6623906 | 34.0652743 | 43.8084118 |
| H  | 34.9904390 | 41.4635111 | 36.9326603 | H | 44.2667203 | 34.9572850 | 43.5757826 |
| Fe | 33.8246328 | 38.7695555 | 40.3269895 | H | 44.2982743 | 33.3262261 | 44.3204516 |
| C  | 35.3420265 | 38.8253027 | 36.2600323 | H | 43.3025290 | 33.6128452 | 42.8752990 |
| O  | 35.8705192 | 38.9173351 | 41.2314890 | N | 42.9773600 | 35.1038187 | 45.8928792 |
| C  | 42.4657945 | 34.4443055 | 44.6928644 | C | 42.3611435 | 36.1058953 | 46.6022373 |
| H  | 41.8401737 | 35.1641614 | 44.1359588 | O | 43.0249388 | 37.0073693 | 47.0951178 |
| C  | 41.6173222 | 33.1626961 | 44.9066690 | H | 43.9844882 | 35.2585163 | 45.8766518 |
| N  | 40.6425349 | 33.0725754 | 43.9623599 | C | 40.8265149 | 35.9893869 | 46.8220324 |
| H  | 40.5973492 | 33.8417551 | 43.3026248 | H | 40.5963345 | 34.9193334 | 46.8235687 |
| O  | 41.8471335 | 32.3192197 | 45.7614152 | C | 39.9589287 | 36.6274616 | 45.7206415 |
| C  | 39.9657598 | 31.8609541 | 43.5214733 | C | 40.1984681 | 37.9817808 | 45.2357071 |
| H  | 40.0043997 | 31.1577039 | 44.3623657 | C | 39.2758568 | 38.6590598 | 44.4951766 |
| C  | 38.4764156 | 32.1106098 | 43.1640975 | H | 41.1466304 | 38.4693556 | 45.4881726 |
| H  | 37.8431359 | 32.0283234 | 44.0569095 | C | 37.9616183 | 38.0802896 | 44.1949688 |
| H  | 38.2011012 | 31.3048570 | 42.4657115 | H | 39.4446807 | 39.6840526 | 44.1573761 |
| C  | 38.2482803 | 33.4527248 | 42.5225896 | C | 37.8095380 | 36.6097056 | 44.4616801 |
| C  | 37.2997906 | 34.3742915 | 43.0879365 | C | 38.8477553 | 35.9664674 | 45.2776999 |
| C  | 37.3433257 | 35.7893529 | 42.8315010 | H | 36.8188487 | 36.4096277 | 44.8899849 |
| H  | 36.5832198 | 33.9904625 | 43.8222086 | H | 38.6490069 | 34.9516534 | 45.6368162 |
| C  | 38.1533271 | 36.1995872 | 41.6284948 | O | 37.0188152 | 38.7552461 | 43.7767523 |
| H  | 36.3750149 | 36.3078729 | 42.8146708 | H | 35.9669424 | 39.0283015 | 42.1973107 |
| C  | 38.9183241 | 35.1898585 | 40.9585436 | N | 40.4766584 | 36.4452474 | 48.1839421 |
| C  | 38.9979161 | 33.8596656 | 41.4188179 | C | 39.9290256 | 35.6093081 | 49.1407901 |
| H  | 39.4534787 | 35.5136635 | 40.0620142 | O | 39.8411524 | 35.8481623 | 50.3337215 |

|           |            |            |            |    |            |            |            |
|-----------|------------|------------|------------|----|------------|------------|------------|
| O         | 39.4499403 | 34.4812868 | 48.5843314 | C  | 32.6519553 | 40.0547251 | 44.2387097 |
| C         | 38.9532001 | 33.4679850 | 49.4631954 | C  | 32.7831728 | 36.7231084 | 42.8595498 |
| H         | 38.3767328 | 33.9225578 | 50.2801506 | H  | 32.4246675 | 36.0708767 | 43.6580466 |
| H         | 39.7803037 | 32.8743879 | 49.8814716 | C  | 33.2266432 | 36.1130699 | 41.6894672 |
| H         | 30.8958916 | 37.7508621 | 39.4561875 | C  | 33.2469287 | 34.6849999 | 41.4589085 |
| H         | 34.6280266 | 43.5994848 | 38.3790836 | C  | 34.1492676 | 35.7994071 | 39.7101898 |
| H         | 33.5545674 | 44.0977418 | 40.7231493 | N  | 33.7591909 | 36.7707251 | 40.6014672 |
| H         | 31.8273081 | 38.2142012 | 45.1656871 | C  | 33.8471388 | 34.4862016 | 40.2429714 |
| H         | 32.5895019 | 40.8163431 | 45.0320943 | C  | 34.7161774 | 36.0259886 | 38.4583046 |
| H         | 32.8364461 | 33.9070373 | 42.1112337 | H  | 34.9548184 | 35.1376410 | 37.8741950 |
| H         | 34.0959257 | 33.5342201 | 39.7877346 | C  | 34.9266236 | 37.2669668 | 37.8580592 |
| H         | 35.7870227 | 36.6744982 | 35.8705581 | C  | 35.3949094 | 37.4688914 | 36.4919766 |
| H         | 35.5578712 | 39.4004818 | 35.3596728 | N  | 34.6437456 | 38.4669989 | 38.4536025 |
| H         | 40.6653662 | 37.3796219 | 48.4861110 | C  | 34.8838273 | 39.4270452 | 37.5031688 |
| H         | 38.3151103 | 32.8323880 | 48.8492532 | C  | 34.7217907 | 40.7893125 | 37.7280199 |
| H         | 43.0377724 | 30.7467418 | 40.6891746 | H  | 34.9923636 | 41.4623525 | 36.9185965 |
| H         | 42.9300118 | 29.3843277 | 41.8855414 | Fe | 33.8080437 | 38.7679468 | 40.3076266 |
| H         | 44.0219389 | 30.7582619 | 42.1865706 | C  | 35.3397116 | 38.8224659 | 36.2470521 |
|           |            |            |            | O  | 35.8800945 | 38.9045377 | 41.2342764 |
| <b>PC</b> |            |            |            | C  | 42.4509051 | 34.4749225 | 44.6943871 |
| S         | 31.4995397 | 38.9740197 | 39.2975285 | H  | 41.8276815 | 35.1881157 | 44.1266366 |
| N         | 33.9120026 | 40.7973822 | 40.0464057 | C  | 41.6062314 | 33.1911089 | 44.9128806 |
| C         | 34.3379939 | 41.4218941 | 38.9087134 | N  | 40.6388500 | 33.0852823 | 43.9618621 |
| C         | 33.6089355 | 41.7795715 | 40.9603207 | H  | 40.6009833 | 33.8390468 | 43.2837904 |
| C         | 34.3113435 | 42.8556950 | 39.0992217 | O  | 41.8342598 | 32.3569036 | 45.7768136 |
| C         | 33.7970506 | 43.0929982 | 40.3546582 | C  | 39.9682744 | 31.8644362 | 43.5345250 |
| C         | 33.3206688 | 41.5089792 | 42.2991846 | H  | 40.0282921 | 31.1660535 | 44.3782597 |
| H         | 33.2593852 | 42.3561480 | 42.9781905 | C  | 38.4705598 | 32.0934705 | 43.1934073 |
| C         | 33.1218084 | 40.2571598 | 42.8779694 | H  | 37.8463228 | 31.9847485 | 44.0892429 |
| N         | 33.2072054 | 39.0540763 | 42.2198737 | H  | 38.2036346 | 31.2972205 | 42.4820788 |
| C         | 32.7786634 | 38.0955915 | 43.1052451 | C  | 38.2165663 | 33.4436565 | 42.5768429 |
| C         | 32.3701397 | 38.7153629 | 44.3530004 | C  | 37.3300502 | 34.3731041 | 43.2501029 |

|   |            |            |            |             |            |            |            |
|---|------------|------------|------------|-------------|------------|------------|------------|
| C | 37.3943979 | 35.8508448 | 43.0581048 | H           | 36.9044685 | 36.4096343 | 45.0499111 |
| H | 36.6389957 | 33.9773800 | 44.0022233 | H           | 38.8168681 | 34.9013982 | 45.4566104 |
| C | 38.1935238 | 36.2492998 | 41.8063320 | O           | 36.9021863 | 38.7339721 | 43.8516296 |
| H | 36.3802879 | 36.2550147 | 42.8715743 | H           | 35.9501998 | 38.9672653 | 42.2061098 |
| C | 38.8066416 | 35.2218531 | 41.0224373 | N           | 40.4955118 | 36.4586052 | 48.2339186 |
| C | 38.8872428 | 33.8542112 | 41.4418964 | C           | 39.9371007 | 35.6071363 | 49.1724631 |
| H | 39.2801769 | 35.5560301 | 40.0952064 | O           | 39.8557572 | 35.8217031 | 50.3705158 |
| H | 39.4988722 | 33.1395451 | 40.8877945 | O           | 39.4434887 | 34.4972370 | 48.5957509 |
| O | 38.2494031 | 37.4401360 | 41.4470935 | C           | 38.9468055 | 33.4748604 | 49.4655819 |
| H | 36.7157434 | 38.4633349 | 40.9933125 | H           | 38.3656192 | 33.9217092 | 50.2832726 |
| C | 40.7341506 | 31.2022734 | 42.3419287 | H           | 39.7754005 | 32.8834212 | 49.8837379 |
| O | 40.1293466 | 30.7780803 | 41.3696437 | H           | 30.8859261 | 37.7466857 | 39.4440780 |
| O | 42.0151646 | 31.1898445 | 42.5739154 | H           | 34.6274092 | 43.5975685 | 38.3658778 |
| C | 43.0712443 | 30.4634778 | 41.7382777 | H           | 33.5566505 | 44.0949340 | 40.7101856 |
| C | 43.6542119 | 34.0868480 | 43.8221429 | H           | 31.8244141 | 38.2133853 | 45.1519179 |
| H | 44.2551985 | 34.9771758 | 43.5749834 | H           | 32.5858857 | 40.8150651 | 45.0169031 |
| H | 44.2909920 | 33.3605129 | 44.3510063 | H           | 32.8445716 | 33.9048525 | 42.1050864 |
| H | 43.3010946 | 33.6139526 | 42.8966684 | H           | 34.0989311 | 33.5325173 | 39.7791244 |
| N | 42.9578093 | 35.1488351 | 45.8901997 | H           | 35.7814705 | 36.6712242 | 35.8576544 |
| C | 42.3471035 | 36.1534568 | 46.6009062 | H           | 35.5555275 | 39.3971176 | 35.3463491 |
| O | 43.0154773 | 37.0632673 | 47.0728138 | H           | 40.7180652 | 37.3726001 | 48.5731171 |
| H | 43.9638014 | 35.3102045 | 45.8660848 | H           | 38.3130680 | 32.8388513 | 48.8475719 |
| C | 40.8181469 | 36.0308671 | 46.8562703 | H           | 43.0313588 | 30.7562669 | 40.6891110 |
| H | 40.5898458 | 34.9606496 | 46.8404079 | H           | 42.9238028 | 29.3933843 | 41.8839765 |
| C | 39.9190801 | 36.6824540 | 45.7880290 | H           | 44.0184536 | 30.7656324 | 42.1850038 |
| C | 40.0429137 | 38.1025266 | 45.4367947 |             |            |            |            |
| C | 39.0950091 | 38.7652725 | 44.7270235 | <b>TS2'</b> |            |            |            |
| H | 40.9425573 | 38.6417702 | 45.7528156 | S           | 31.9019104 | 38.7625371 | 39.4731634 |
| C | 37.8601705 | 38.1043732 | 44.2790992 | N           | 34.3118459 | 40.2906678 | 40.1453156 |
| H | 39.1833541 | 39.8264376 | 44.4847917 | C           | 34.6287331 | 40.9655331 | 38.9974601 |
| C | 37.8021981 | 36.5811028 | 44.4235213 | C           | 34.1157509 | 41.2402483 | 41.1163870 |
| C | 38.9159507 | 35.9661454 | 45.2235422 | C           | 34.6485616 | 42.3915042 | 39.2440625 |

|    |            |            |            |   |            |            |            |
|----|------------|------------|------------|---|------------|------------|------------|
| C  | 34.3122498 | 42.5798164 | 40.5640620 | C | 39.6691491 | 32.5586222 | 43.4256801 |
| C  | 33.8597131 | 40.9042331 | 42.4479378 | H | 39.5468194 | 31.8610931 | 44.2691128 |
| H  | 33.9093167 | 41.7046000 | 43.1806164 | C | 38.2599651 | 33.0270606 | 43.0155204 |
| C  | 33.5313028 | 39.6501089 | 42.9557276 | H | 37.6744419 | 33.2827943 | 43.9123353 |
| N  | 33.4887126 | 38.4793055 | 42.2358376 | H | 37.7749833 | 32.1459508 | 42.5587769 |
| C  | 32.9555703 | 37.5353249 | 43.0745602 | C | 38.1549141 | 34.1587888 | 42.0139365 |
| C  | 32.6095849 | 38.1321904 | 44.3542475 | C | 37.0322607 | 34.9702664 | 41.9883233 |
| C  | 33.0239271 | 39.4383045 | 44.3040178 | C | 36.7572197 | 35.8028678 | 40.8698694 |
| C  | 32.8045695 | 36.1852126 | 42.7481979 | H | 36.2404757 | 34.8076516 | 42.7253494 |
| H  | 32.4027739 | 35.5281176 | 43.5227369 | C | 37.8114623 | 36.0227074 | 39.8287022 |
| C  | 33.1445234 | 35.6054451 | 41.5282773 | H | 35.7309784 | 35.8363705 | 40.5373047 |
| C  | 33.0682475 | 34.1944376 | 41.2236250 | C | 39.0022481 | 35.1758909 | 39.9353185 |
| C  | 33.9529446 | 35.3432840 | 39.4930613 | C | 39.1562123 | 34.3064742 | 40.9643998 |
| N  | 33.6823464 | 36.2844671 | 40.4563613 | H | 39.7643204 | 35.3155477 | 39.1663529 |
| C  | 33.6023157 | 34.0217074 | 39.9745535 | H | 40.0539433 | 33.6898295 | 41.0042956 |
| C  | 34.5624135 | 35.6046096 | 38.2651682 | O | 37.6971556 | 36.8573501 | 38.9357412 |
| H  | 34.7652420 | 34.7365828 | 37.6446108 | H | 36.5363365 | 38.0669597 | 40.1995047 |
| C  | 34.9016614 | 36.8490511 | 37.7397903 | C | 40.3770923 | 31.7217540 | 42.3107034 |
| C  | 35.3941188 | 37.0834377 | 36.3868289 | O | 39.7154626 | 31.1925137 | 41.4310006 |
| N  | 34.7159195 | 38.0329872 | 38.4007561 | O | 41.6656114 | 31.6876565 | 42.4979142 |
| C  | 35.0077215 | 39.0132544 | 37.4894448 | C | 42.6701922 | 30.8553455 | 41.6985997 |
| C  | 34.9129379 | 40.3717027 | 37.7723402 | C | 43.6768231 | 34.2792797 | 43.9069586 |
| H  | 35.1603632 | 41.0652933 | 36.9734059 | H | 44.3784642 | 35.1169157 | 43.7610296 |
| Fe | 34.0440286 | 38.2478687 | 40.3247469 | H | 44.2023027 | 33.4502304 | 44.4049187 |
| C  | 35.4155705 | 38.4457697 | 36.2024481 | H | 43.3282089 | 33.9250751 | 42.9286373 |
| O  | 36.0096548 | 37.8499690 | 40.9938946 | N | 42.9467698 | 35.2564921 | 46.0106099 |
| C  | 42.4684567 | 34.7268646 | 44.7374085 | C | 42.3189596 | 36.2304580 | 46.7505332 |
| H  | 41.9596779 | 35.5377019 | 44.1867791 | O | 42.9791195 | 37.0945965 | 47.3060243 |
| C  | 41.4862171 | 33.5377319 | 44.8309121 | H | 43.9545091 | 35.4058778 | 46.0330568 |
| N  | 40.4885534 | 33.6531800 | 43.9116769 | C | 40.7788922 | 36.1746493 | 46.8946191 |
| H  | 40.4862808 | 34.5027578 | 43.3588006 | H | 40.4839416 | 35.1228321 | 46.8156028 |
| O  | 41.6345203 | 32.5849872 | 45.5828251 | C | 40.0718852 | 36.9390868 | 45.7666281 |



C 40.6501673 38.0314754 45.0920754  
 C 39.9881146 38.6705637 44.0405132  
 H 41.6420354 38.3878666 45.3842731  
 C 38.7106838 38.2425892 43.6302750  
 H 40.4534931 39.5039939 43.5087770  
 C 38.1030293 37.1867454 44.3375695  
 C 38.7830638 36.5406985 45.3709933  
 H 37.0931540 36.8714744 44.0666152  
 H 38.2958715 35.7092035 45.8882119  
 O 38.1411274 38.8590844 42.5788500  
 H 37.2909389 38.4572270 42.2864895  
 N 40.3815906 36.5716048 48.2587429  
 C 39.8863143 35.6870174 49.1945210  
 O 39.7957640 35.8887374 50.3948644  
 O 39.4504220 34.5544217 48.6076150  
 C 39.0094767 33.4908226 49.4531272  
 H 38.4968331 33.9005157 50.3334550  
 H 39.8612074 32.8746911 49.7785201  
 H 31.1118561 37.6313065 39.4950453  
 H 34.8532760 43.1697642 38.5088955  
 H 34.2288389 43.5747086 41.0014397  
 H 32.0090285 37.6606815 45.1321154  
 H 32.9667181 40.1796239 45.1010371  
 H 32.7026418 33.4157845 41.8930270  
 H 33.8509283 33.0843094 39.4770156  
 H 35.7585276 36.2998607 35.7225396  
 H 35.6430053 39.0487533 35.3233853  
 H 40.5338469 37.5101499 48.5684581  
 H 38.3242823 32.8848915 48.8603175  
 H 42.6763466 31.1813629 40.6585314  
 H 42.4224464 29.7998245 41.8106915  
 H 43.6281221 31.0455654 42.1825975

**PC'**

S 31.4853311 39.0056800 39.2594768  
 N 33.7800426 40.7750320 39.9234115  
 C 34.1616286 41.4195420 38.7779101  
 C 33.4903913 41.7628683 40.8408763  
 C 34.0890765 42.8536629 38.9556467  
 C 33.6384034 43.0813366 40.2341958  
 C 33.2715936 41.4843392 42.1877746  
 H 33.2314511 42.3257640 42.8754771  
 C 33.1159101 40.2288713 42.7644329  
 N 33.1872263 39.0250714 42.0886795  
 C 32.7643468 38.0724113 42.9985846  
 C 32.4055176 38.6911095 44.2586295  
 C 32.6976660 40.0270627 44.1391017  
 C 32.7253476 36.7023439 42.7549105  
 H 32.3854132 36.0554345 43.5662104  
 C 33.1067674 36.0935390 41.5675782  
 C 33.1003913 34.6710088 41.3247381  
 C 33.9823093 35.7866843 39.5682889  
 N 33.6309842 36.7683132 40.4762942  
 C 33.6698017 34.4734878 40.0939891  
 C 34.5743119 36.0282758 38.3357043  
 H 34.8244429 35.1501561 37.7424140  
 C 34.8271976 37.2754604 37.7725263  
 C 35.3709400 37.4811562 36.4386747  
 N 34.5174283 38.4741331 38.3726049  
 C 34.8067828 39.4323670 37.4226040  
 C 34.6118925 40.7902623 37.6239078

|    |            |            |            |   |            |            |            |
|----|------------|------------|------------|---|------------|------------|------------|
| H  | 34.9191727 | 41.4594788 | 36.8254435 | H | 44.3661300 | 34.9541323 | 43.6236246 |
| Fe | 33.5539044 | 38.7467381 | 40.1375158 | H | 44.3759158 | 33.2774000 | 44.2617534 |
| C  | 35.3293400 | 38.8336659 | 36.1946264 | H | 43.3604182 | 33.6780882 | 42.8584812 |
| O  | 36.3232161 | 36.5099672 | 42.0266718 | N | 43.1304660 | 34.9317281 | 45.9940453 |
| C  | 42.5777865 | 34.4113615 | 44.7445375 | C | 42.5690529 | 35.9291175 | 46.7597752 |
| H  | 41.9801100 | 35.2049384 | 44.2629667 | O | 43.2819972 | 36.7847516 | 47.2585689 |
| C  | 41.6731578 | 33.1655252 | 44.8704765 | H | 44.1414974 | 35.0584867 | 45.9655541 |
| N  | 40.7276139 | 33.1454973 | 43.8938337 | C | 41.0435750 | 35.9082664 | 46.9824611 |
| H  | 40.6880404 | 33.9526102 | 43.2804838 | H | 40.7278331 | 34.8610643 | 46.9474404 |
| O  | 41.8375678 | 32.2781445 | 45.6982931 | C | 40.3132264 | 36.6482793 | 45.8634741 |
| C  | 40.0145619 | 31.9618167 | 43.4480762 | C | 40.8378174 | 37.7794789 | 45.2108572 |
| H  | 40.0060176 | 31.2768327 | 44.3061276 | C | 40.1340929 | 38.4136941 | 44.1842137 |
| C  | 38.5496837 | 32.2530606 | 43.0812055 | H | 41.8215797 | 38.1645825 | 45.4948845 |
| H  | 37.9633382 | 32.3975668 | 44.0000090 | C | 38.8754888 | 37.9285535 | 43.7891819 |
| H  | 38.1783895 | 31.3404103 | 42.5905679 | H | 40.5550561 | 39.2737697 | 43.6581005 |
| C  | 38.2899317 | 33.4369211 | 42.1698852 | C | 38.3224039 | 36.8312315 | 44.4760378 |
| C  | 37.3003365 | 34.3219026 | 42.4374637 | C | 39.0434725 | 36.1921668 | 45.4783468 |
| C  | 36.8785029 | 35.3484631 | 41.4366779 | H | 37.3236983 | 36.4866232 | 44.2088790 |
| H  | 36.6775819 | 34.2236314 | 43.3316417 | H | 38.6063415 | 35.3253165 | 45.9815038 |
| C  | 37.8866723 | 35.6827346 | 40.3301026 | O | 38.2381831 | 38.5135681 | 42.7552537 |
| H  | 36.0781181 | 34.8253230 | 40.8662373 | H | 37.5046916 | 37.9303889 | 42.4694955 |
| C  | 38.9338875 | 34.6862435 | 40.1106486 | N | 40.6916989 | 36.3611054 | 48.3420400 |
| C  | 39.0946535 | 33.6363574 | 40.9598468 | C | 40.0451216 | 35.5648620 | 49.2605000 |
| H  | 39.6004751 | 34.8509609 | 39.2596196 | O | 39.9004809 | 35.8087835 | 50.4481552 |
| H  | 39.8687088 | 32.8952417 | 40.7505446 | O | 39.5265843 | 34.4662642 | 48.6754656 |
| O  | 37.7361045 | 36.6854529 | 39.6519114 | C | 38.9633339 | 33.4610149 | 49.5178352 |
| H  | 35.7024359 | 36.8977316 | 41.3887404 | H | 38.3796564 | 33.9249953 | 50.3245260 |
| C  | 40.7789116 | 31.2037042 | 42.3173296 | H | 39.7520448 | 32.8275829 | 49.9526337 |
| O  | 40.1676960 | 30.6887305 | 41.3929423 | H | 30.8534724 | 37.7871784 | 39.4021500 |
| O  | 42.0621820 | 31.2089263 | 42.5357355 | H | 34.3220889 | 43.6078409 | 38.2039900 |
| C  | 43.1057736 | 30.4376927 | 41.7322893 | H | 33.4331961 | 44.0819695 | 40.6145783 |
| C  | 43.7469857 | 34.0617037 | 43.8119030 | H | 31.8756685 | 38.1971954 | 45.0731084 |

H 32.6567553 40.7855079 44.9208653  
H 32.7158710 33.8947479 41.9862744  
H 33.9283026 33.5189493 39.6356217  
H 35.8082944 36.6884016 35.8317740  
H 35.5920030 39.4081964 35.3063753  
H 40.8878431 37.3011064 48.6211418  
H 38.3209409 32.8573525 48.8767501  
H 43.0653238 30.6963764 40.6742185  
H 42.9554683 29.3735004 41.9138667  
H 44.0536802 30.7517102 42.1692484

**Variant 2**

**RC**

S 34.2519096 35.9344442 25.2867048  
N 36.8853297 35.7520936 26.4630355  
C 37.5765216 34.8251382 25.7405067  
C 37.5573059 36.9415771 26.3434515  
C 38.7366113 35.4415680 25.1297884  
C 38.7012667 36.7800610 25.4569196  
C 37.2275513 38.0841791 27.0837469  
H 37.9523783 38.8958111 27.0678929  
C 36.1036451 38.2963201 27.8788705  
N 35.1310550 37.3546136 28.1123961  
C 34.2047688 37.9582470 28.9144179  
C 34.5609737 39.3449148 29.1516459  
C 35.7625062 39.5577485 28.5237019  
C 33.0690788 37.3288008 29.4401999  
H 32.4298766 37.9373127 30.0809816  
C 32.6844599 36.0092556 29.2374865  
C 31.5023144 35.3843662 29.8091805  
C 32.7346739 33.9130269 28.6098989

N 33.4015160 35.0986458 28.4951517  
C 31.5416039 34.0701404 29.4265570  
C 33.1244382 32.7094176 28.0139583  
H 32.4592585 31.8642719 28.1906733  
C 34.2295084 32.4926207 27.1880494  
C 34.5308269 31.2393336 26.4981114  
N 35.1545485 33.4494840 26.8856394  
C 36.0479903 32.8502206 26.0397408  
C 37.1795334 33.4968159 25.5460706  
H 37.8563308 32.8995048 24.9395688  
Fe 35.2034576 35.3914994 27.5612395  
C 35.6555886 31.4639962 25.7417266  
O 36.0557397 35.0059678 28.9066889  
C 35.8481162 33.3565950 38.9396184  
H 36.6387504 32.7349134 39.3801744  
C 34.7316127 32.3227017 38.6662779  
N 34.0018400 32.3995429 37.5279953  
H 34.0980686 33.2289706 36.9411511  
O 34.5200640 31.4811015 39.5276147  
C 32.9148508 31.4589451 37.3410834  
H 32.2602829 31.4649458 38.2268940  
C 32.0253852 31.8441016 36.1317575  
H 31.5635932 32.8163235 36.3648992  
H 31.2138209 31.1012113 36.1108794  
C 32.7048429 31.9073929 34.7837723  
C 32.9767992 30.7237872 34.0627538  
C 33.6014242 30.7673482 32.8267166  
H 32.7050140 29.7592494 34.4988226  
C 33.9806289 31.9942245 32.2478856  
H 33.8692727 29.8646208 32.2758925  
C 33.7058788 33.1878614 32.9477328  
C 33.0814795 33.1331334 34.1934568

|   |            |            |            |   |            |            |            |
|---|------------|------------|------------|---|------------|------------|------------|
| H | 33.9884634 | 34.1502461 | 32.5149690 | C | 37.2068268 | 33.2131274 | 33.1558076 |
| H | 32.8908744 | 34.0681194 | 34.7267288 | H | 37.2769874 | 33.0691536 | 35.2949412 |
| O | 34.5779378 | 31.9385814 | 31.0417475 | C | 37.0317872 | 34.0523062 | 32.0443284 |
| H | 35.2646954 | 32.6343249 | 30.9143717 | H | 37.2789686 | 32.1364235 | 32.9918740 |
| C | 33.4727157 | 30.0214217 | 37.2422999 | C | 36.9702795 | 35.4415200 | 32.2285338 |
| O | 34.5941036 | 29.7596638 | 36.8703714 | C | 36.9981494 | 35.9640579 | 33.5239043 |
| O | 32.5380524 | 29.1487453 | 37.6071698 | H | 36.8549648 | 36.0957793 | 31.3608793 |
| C | 32.8346512 | 27.7273771 | 37.9034955 | H | 36.9215667 | 37.0465514 | 33.6596560 |
| C | 33.2822178 | 27.0059460 | 36.6289298 | O | 36.8614919 | 33.4591504 | 30.8334810 |
| H | 32.5123578 | 27.1078434 | 35.8463693 | H | 36.6895428 | 34.1123727 | 30.1010841 |
| H | 33.4183443 | 25.9343654 | 36.8415990 | N | 38.2042613 | 36.0271513 | 36.7305018 |
| H | 34.2296518 | 27.4135091 | 36.2539856 | C | 38.2104589 | 36.9402741 | 37.7602853 |
| C | 31.5000664 | 27.1813821 | 38.4007143 | O | 39.2114236 | 37.3576456 | 38.3176606 |
| H | 31.6127775 | 26.1244873 | 38.6842302 | O | 36.9564182 | 37.3085205 | 38.0944026 |
| H | 30.7382900 | 27.2529283 | 37.6157608 | C | 36.8248146 | 38.2976422 | 39.1424381 |
| H | 31.1527121 | 27.7514607 | 39.2749542 | H | 37.2781698 | 39.2327463 | 38.7796843 |
| C | 33.8804819 | 27.6531957 | 39.0099742 | H | 37.4071725 | 37.9661138 | 40.0121664 |
| H | 34.8527333 | 28.0385035 | 38.6810865 | C | 35.3680082 | 38.4938700 | 39.4768145 |
| H | 33.5611090 | 28.2407884 | 39.8835185 | C | 34.5817747 | 39.3988117 | 38.7443655 |
| H | 33.9888219 | 26.6035294 | 39.3183682 | H | 35.0368848 | 39.9450431 | 37.9132550 |
| C | 35.3794991 | 34.3414985 | 40.0187819 | C | 33.2467508 | 39.6319981 | 39.0879330 |
| H | 34.5917204 | 35.0072670 | 39.6381514 | C | 32.6689311 | 38.9476765 | 40.1654205 |
| H | 34.9875771 | 33.7711820 | 40.8714742 | H | 32.6510179 | 40.3635942 | 38.5364911 |
| H | 36.2232152 | 34.9547451 | 40.3688248 | H | 31.6331834 | 39.1555247 | 40.4487047 |
| N | 36.4996924 | 34.0423798 | 37.8034401 | C | 33.4368145 | 38.0223138 | 40.8845697 |
| C | 35.9475739 | 34.8779380 | 36.8933295 | C | 34.7775094 | 37.8027225 | 40.5461010 |
| O | 34.7443283 | 34.9674747 | 36.6628505 | H | 32.9973757 | 37.4868231 | 41.7304757 |
| H | 37.5029742 | 34.1538555 | 37.9139710 | H | 35.3764882 | 37.1111065 | 41.1430988 |
| C | 36.9280529 | 35.7300538 | 36.0441512 | C | 39.4915861 | 35.6190508 | 36.1713530 |
| H | 36.3782636 | 36.6729729 | 35.9277637 | H | 39.7051909 | 36.1300868 | 35.2176067 |
| C | 37.0806070 | 35.1316950 | 34.6513691 | H | 39.5116553 | 34.5355044 | 35.9879586 |
| C | 37.2147621 | 33.7486093 | 34.4409535 | H | 40.2736534 | 35.8790076 | 36.8939608 |

O 41.1633116 40.4920114 41.0440115  
H 41.2603116 40.6340114 40.1880113  
H 41.6963117 41.0770115 41.4110116  
O 40.0103112 37.9030107 41.0350115  
H 40.6103114 38.5330108 40.9750115  
H 39.9303112 37.6180106 40.2140113  
H 32.8912016 36.0847270 25.4605899  
H 39.4413093 34.9572765 24.4538226  
H 39.3803198 37.5094593 25.0154082  
H 33.9269729 40.0932737 29.6271131  
H 36.3196552 40.4945782 28.5222285  
H 30.7148503 35.8570987 30.3961144  
H 30.8523550 33.2729856 29.7050305  
H 33.9848315 30.3095958 26.6579357  
H 36.1907280 30.8225512 25.0415543

### TS1

S 34.2651792 35.9177230 25.3730297  
N 36.9004020 35.7985079 26.4541610  
C 37.6054622 34.8638799 25.7520526  
C 37.5574783 36.9956194 26.3217609  
C 38.7606850 35.4864610 25.1379986  
C 38.7086372 36.8293977 25.4432284  
C 37.2168352 38.1481456 27.0365348  
H 37.9290744 38.9693436 27.0040588  
C 36.1027759 38.3473362 27.8470636  
N 35.1443517 37.3998389 28.1087352  
C 34.2268838 37.9949871 28.9328822  
C 34.5762821 39.3863476 29.1517914  
C 35.7604807 39.6077483 28.4958801  
C 33.1091851 37.3640538 29.4810888  
H 32.4727313 37.9702333 30.1257893

C 32.7367860 36.0398684 29.2835536  
C 31.5529507 35.4122665 29.8478517  
C 32.7706522 33.9434015 28.6270847  
N 33.4484813 35.1300698 28.5347334  
C 31.5794672 34.1031177 29.4438878  
C 33.1484147 32.7460097 28.0217378  
H 32.4721508 31.9055251 28.1759581  
C 34.2700814 32.5302863 27.2213566  
C 34.5750853 31.2802662 26.5294911  
N 35.2104369 33.4800629 26.9376617  
C 36.1064628 32.8849688 26.0879710  
C 37.2301288 33.5303354 25.5792950  
H 37.9109727 32.9299889 24.9815145  
Fe 35.2234810 35.4336924 27.5660014  
C 35.7088965 31.5020599 25.7847850  
O 36.1389185 35.1065386 28.9530226  
C 35.8055804 33.3600079 38.9706325  
H 36.6081084 32.7426447 39.3958478  
C 34.6844013 32.3241777 38.7299094  
N 33.9383356 32.3867061 37.6004517  
H 34.0042809 33.2226049 37.0178155  
O 34.4876873 31.4909192 39.6018490  
C 32.8551394 31.4369143 37.4427996  
H 32.2117794 31.4473775 38.3365874  
C 31.9459866 31.8051919 36.2433458  
H 31.4762450 32.7736172 36.4724933  
H 31.1440001 31.0511103 36.2365870  
C 32.6009688 31.8609931 34.8856208  
C 33.0048186 30.6667020 34.2350244  
C 33.5876069 30.7017356 32.9844853  
H 32.8632402 29.7072453 34.7358333  
C 33.7768583 31.9260229 32.3011803

|   |            |            |            |   |            |            |            |
|---|------------|------------|------------|---|------------|------------|------------|
| H | 33.9440432 | 29.8023892 | 32.4806667 | H | 36.2543021 | 36.6473685 | 35.9260169 |
| C | 33.3717803 | 33.1290153 | 32.9358060 | C | 36.8674287 | 35.1090145 | 34.6110066 |
| C | 32.8006878 | 33.0821358 | 34.2054569 | C | 36.8297093 | 33.7222223 | 34.3795821 |
| H | 33.4906711 | 34.0810821 | 32.4143011 | C | 36.6874853 | 33.2145349 | 33.0934477 |
| H | 32.4956477 | 34.0169886 | 34.6832072 | H | 36.8574965 | 33.0269461 | 35.2227515 |
| O | 34.3083197 | 31.8616084 | 31.0820085 | C | 36.5411956 | 34.0878170 | 31.9755400 |
| H | 34.9336051 | 32.6193630 | 30.8750364 | H | 36.6472161 | 32.1395186 | 32.9144150 |
| C | 33.4225570 | 30.0036880 | 37.3462828 | C | 36.6810960 | 35.4874911 | 32.1976311 |
| O | 34.5417110 | 29.7501444 | 36.9597286 | C | 36.8428948 | 35.9702553 | 33.4878972 |
| O | 32.4958790 | 29.1269611 | 37.7153017 | H | 36.6187046 | 36.1631162 | 31.3417815 |
| C | 32.7900760 | 27.6939007 | 37.9603975 | H | 36.9119403 | 37.0505212 | 33.6457819 |
| C | 33.2074142 | 27.0146057 | 36.6526156 | O | 36.2376459 | 33.5787432 | 30.8002119 |
| H | 32.4234764 | 27.1511709 | 35.8896343 | H | 36.1719593 | 34.3369322 | 29.8246510 |
| H | 33.3361061 | 25.9349517 | 36.8250749 | N | 38.1059871 | 35.9876735 | 36.6457809 |
| H | 34.1535498 | 27.4238432 | 36.2755737 | C | 38.1601883 | 36.8928242 | 37.6867034 |
| C | 31.4621231 | 27.1395719 | 38.4650622 | O | 39.1830154 | 37.2710845 | 38.2295098 |
| H | 31.5749418 | 26.0732750 | 38.7102394 | O | 36.9233345 | 37.2910214 | 38.0465847 |
| H | 30.6845259 | 27.2414520 | 37.6991939 | C | 36.8261604 | 38.2768248 | 39.1040265 |
| H | 31.1367180 | 27.6809421 | 39.3656188 | H | 37.2961604 | 39.2036220 | 38.7409236 |
| C | 33.8580471 | 27.5791557 | 39.0405703 | H | 37.4081087 | 37.9280454 | 39.9679708 |
| H | 34.8228354 | 27.9768811 | 38.7048179 | C | 35.3754251 | 38.4978971 | 39.4489431 |
| H | 33.5574271 | 28.1323264 | 39.9428609 | C | 34.5951745 | 39.4038620 | 38.7111370 |
| H | 33.9716109 | 26.5186288 | 39.3064505 | H | 35.0528630 | 39.9417270 | 37.8759250 |
| C | 35.3641569 | 34.3538444 | 40.0526084 | C | 33.2622040 | 39.6482376 | 39.0544987 |
| H | 34.5639584 | 35.0140241 | 39.6887170 | C | 32.6801591 | 38.9740446 | 40.1362588 |
| H | 34.9980690 | 33.7895096 | 40.9205492 | H | 32.6711833 | 40.3803183 | 38.4986743 |
| H | 36.2151761 | 34.9722016 | 40.3744501 | H | 31.6455412 | 39.1890926 | 40.4184648 |
| N | 36.4262745 | 34.0355197 | 37.8103736 | C | 33.4430684 | 38.0506668 | 40.8628828 |
| C | 35.8497651 | 34.8554718 | 36.9030695 | C | 34.7824214 | 37.8207579 | 40.5256566 |
| O | 34.6423379 | 34.9410417 | 36.6956006 | H | 33.0007927 | 37.5246432 | 41.7132934 |
| H | 37.4328575 | 34.1440332 | 37.8892043 | H | 35.3776918 | 37.1308809 | 41.1284154 |
| C | 36.8017372 | 35.6998814 | 36.0161110 | C | 39.3641176 | 35.5378159 | 36.0542972 |

|            |            |            |            |    |            |            |            |
|------------|------------|------------|------------|----|------------|------------|------------|
| H          | 39.5818061 | 36.0554924 | 35.1048320 | C  | 35.7553281 | 39.6493489 | 28.4366933 |
| H          | 39.3357606 | 34.4564394 | 35.8558079 | C  | 33.1296446 | 37.4002571 | 29.4661837 |
| H          | 40.1714091 | 35.7544180 | 36.7639300 | H  | 32.5036783 | 38.0022364 | 30.1244218 |
| O          | 41.1633116 | 40.4920114 | 41.0440115 | C  | 32.7559021 | 36.0784263 | 29.2645419 |
| H          | 41.2603116 | 40.6340114 | 40.1880113 | C  | 31.5759335 | 35.4505161 | 29.8330569 |
| H          | 41.6963117 | 41.0770115 | 41.4110116 | C  | 32.7792193 | 33.9805764 | 28.5990627 |
| O          | 40.0103112 | 37.9030107 | 41.0350115 | N  | 33.4632378 | 35.1697312 | 28.5055997 |
| H          | 40.6103114 | 38.5330108 | 40.9750115 | C  | 31.5965515 | 34.1426650 | 29.4247625 |
| H          | 39.9303112 | 37.6180106 | 40.2140113 | C  | 33.1489096 | 32.7851959 | 27.9946018 |
| H          | 32.9031547 | 36.0713081 | 25.5331804 | H  | 32.4780544 | 31.9423596 | 28.1565756 |
| H          | 39.4771475 | 35.0014534 | 24.4750382 | C  | 34.2770381 | 32.5702432 | 27.2066410 |
| H          | 39.3877416 | 37.5555969 | 24.9965529 | C  | 34.5902108 | 31.3189460 | 26.5256361 |
| H          | 33.9456037 | 40.1322612 | 29.6354493 | N  | 35.2192060 | 33.5220200 | 26.9231616 |
| H          | 36.3053799 | 40.5516127 | 28.4793895 | C  | 36.1176497 | 32.9249613 | 26.0717169 |
| H          | 30.7676645 | 35.8770000 | 30.4440190 | C  | 37.2314763 | 33.5704646 | 25.5460696 |
| H          | 30.8814133 | 33.3092038 | 29.7093849 | H  | 37.9156341 | 32.9663875 | 24.9563181 |
| H          | 34.0242653 | 30.3524050 | 26.6835626 | Fe | 35.2034102 | 35.4867184 | 27.5029872 |
| H          | 36.2453336 | 30.8590802 | 25.0870175 | C  | 35.7230419 | 31.5408328 | 25.7783633 |
|            |            |            |            | O  | 36.2242461 | 35.2005257 | 28.8911489 |
|            |            |            |            | C  | 35.7771238 | 33.3752403 | 39.0693377 |
| <b>IM1</b> |            |            |            | H  | 36.5763101 | 32.7456116 | 39.4825103 |
| S          | 34.2431794 | 35.9315173 | 25.3638078 | C  | 34.6369917 | 32.3528791 | 38.8520336 |
| N          | 36.8718983 | 35.8547656 | 26.3716004 | N  | 33.9374289 | 32.3480105 | 37.6919639 |
| C          | 37.5908959 | 34.9096166 | 25.6952703 | H  | 34.0181442 | 33.1437393 | 37.0613841 |
| C          | 37.5317736 | 37.0517780 | 26.2378788 | O  | 34.4011577 | 31.5825820 | 39.7701177 |
| C          | 38.7520750 | 35.5276169 | 25.0898787 | C  | 32.8640875 | 31.3847653 | 37.5408064 |
| C          | 38.6945399 | 36.8743198 | 25.3779757 | H  | 32.2365354 | 31.3925960 | 38.4458424 |
| C          | 37.1903332 | 38.2073056 | 26.9437598 | C  | 31.9333218 | 31.7323829 | 36.3569860 |
| H          | 37.8972697 | 39.0320867 | 26.9037018 | H  | 31.4580832 | 32.6984401 | 36.5865510 |
| C          | 36.0893100 | 38.3956799 | 27.7734503 | H  | 31.1343701 | 30.9757420 | 36.3752149 |
| N          | 35.1376349 | 37.4437291 | 28.0496264 | C  | 32.5595039 | 31.7831165 | 34.9793827 |
| C          | 34.2331354 | 38.0321989 | 28.8976201 | C  | 33.0126106 | 30.6050704 | 34.3503168 |
| C          | 34.5853576 | 39.4208267 | 29.1162614 |    |            |            |            |

|   |            |            |            |   |            |            |            |
|---|------------|------------|------------|---|------------|------------|------------|
| C | 33.5627407 | 30.6407836 | 33.0757266 | O | 34.6135713 | 34.9451998 | 36.7830764 |
| H | 32.9367641 | 29.6486980 | 34.8719658 | H | 37.4039152 | 34.1424627 | 37.9772201 |
| C | 33.6437467 | 31.8420614 | 32.3534343 | C | 36.7697088 | 35.6732328 | 36.0803808 |
| H | 33.9531347 | 29.7458923 | 32.5877234 | H | 36.2215306 | 36.6184878 | 35.9648456 |
| C | 33.1957562 | 33.0271054 | 32.9653485 | C | 36.8322650 | 35.0483262 | 34.6908414 |
| C | 32.6726430 | 32.9877187 | 34.2633829 | C | 36.6779492 | 33.6555466 | 34.4996448 |
| H | 33.2368129 | 33.9701094 | 32.4141226 | C | 36.5360417 | 33.1269565 | 33.2327162 |
| H | 32.3296835 | 33.9195697 | 34.7226481 | H | 36.6136331 | 32.9925400 | 35.3654780 |
| O | 34.1221277 | 31.7798232 | 31.0854598 | C | 36.5123158 | 33.9852431 | 32.0663731 |
| H | 34.7921994 | 32.4803510 | 30.9181894 | H | 36.3938661 | 32.0586515 | 33.0717703 |
| C | 33.4482872 | 29.9594854 | 37.4566574 | C | 36.7874790 | 35.3939607 | 32.2705749 |
| O | 34.5986971 | 29.7149718 | 37.1697682 | C | 36.9349463 | 35.8909517 | 33.5466870 |
| O | 32.4973133 | 29.0704315 | 37.7318302 | H | 36.8165450 | 36.0388286 | 31.3890354 |
| C | 32.7822573 | 27.6425925 | 38.0052328 | H | 37.0907964 | 36.9635770 | 33.6939856 |
| C | 33.2868627 | 26.9593319 | 36.7306364 | O | 36.2157676 | 33.5095380 | 30.9277077 |
| H | 32.5446499 | 27.0667987 | 35.9223703 | H | 36.1251726 | 34.4227618 | 29.5054617 |
| H | 33.4357280 | 25.8856056 | 36.9223750 | N | 38.0785480 | 35.9767777 | 36.6826939 |
| H | 34.2406843 | 27.3909645 | 36.4006964 | C | 38.1428655 | 36.9043729 | 37.7051113 |
| C | 31.4268212 | 27.0848075 | 38.4253033 | O | 39.1712900 | 37.2767565 | 38.2396941 |
| H | 31.5196785 | 26.0134359 | 38.6561579 | O | 36.9111968 | 37.3232780 | 38.0497585 |
| H | 30.6953695 | 27.2076607 | 37.6184600 | C | 36.8113306 | 38.3287154 | 39.0902271 |
| H | 31.0517819 | 27.6120077 | 39.3149481 | H | 37.2589445 | 39.2551392 | 38.7000002 |
| C | 33.7782170 | 27.5403788 | 39.1537771 | H | 37.4128807 | 38.0050882 | 39.9503101 |
| H | 34.7620696 | 27.9340986 | 38.8747491 | C | 35.3613944 | 38.5300113 | 39.4488820 |
| H | 33.4183397 | 28.1058419 | 40.0266554 | C | 34.5639312 | 39.4290897 | 38.7213634 |
| H | 33.8740641 | 26.4842063 | 39.4415431 | H | 35.0095236 | 39.9779177 | 37.8869789 |
| C | 35.3718125 | 34.3799471 | 40.1536078 | C | 33.2294113 | 39.6519073 | 39.0729563 |
| H | 34.5771411 | 35.0518770 | 39.7994559 | C | 32.6634614 | 38.9619649 | 40.1531788 |
| H | 35.0095027 | 33.8236314 | 41.0275564 | H | 32.6245112 | 40.3779469 | 38.5242516 |
| H | 36.2380635 | 34.9849407 | 40.4608403 | H | 31.6272256 | 39.1601036 | 40.4417680 |
| N | 36.3967264 | 34.0393011 | 37.9012251 | C | 33.4439176 | 38.0456971 | 40.8702469 |
| C | 35.8184112 | 34.8520995 | 36.9900540 | C | 34.7848223 | 37.8379023 | 40.5248543 |



|             |            |            |            |    |            |            |            |
|-------------|------------|------------|------------|----|------------|------------|------------|
| H           | 33.0143528 | 37.5082727 | 41.7200937 | N  | 35.0416573 | 37.3466797 | 28.6061713 |
| H           | 35.3934945 | 37.1540251 | 41.1206409 | C  | 34.0442804 | 37.9882532 | 29.2959194 |
| C           | 39.3280143 | 35.4595147 | 36.1301744 | C  | 34.3777014 | 39.3878422 | 29.4876743 |
| H           | 39.5854848 | 35.9346864 | 35.1683167 | C  | 35.6304522 | 39.5715229 | 28.9561749 |
| H           | 39.2609094 | 34.3727929 | 35.9707245 | C  | 32.8676617 | 37.3824720 | 29.7386432 |
| H           | 40.1315076 | 35.6696225 | 36.8462781 | H  | 32.1788432 | 38.0104929 | 30.3042953 |
| O           | 41.1633116 | 40.4920114 | 41.0440115 | C  | 32.4908300 | 36.0617238 | 29.5191297 |
| H           | 41.2603116 | 40.6340114 | 40.1880113 | C  | 31.2605133 | 35.4512161 | 29.9880010 |
| H           | 41.6963117 | 41.0770115 | 41.4110116 | C  | 32.5506830 | 33.9637860 | 28.8773909 |
| O           | 40.0103112 | 37.9030107 | 41.0350115 | N  | 33.2525542 | 35.1409721 | 28.8384121 |
| H           | 40.6103114 | 38.5330108 | 40.9750115 | C  | 31.3024131 | 34.1398239 | 29.5998147 |
| H           | 39.9303112 | 37.6180106 | 40.2140113 | C  | 32.9604592 | 32.7599617 | 28.3089941 |
| H           | 32.8827924 | 36.0928154 | 25.5301726 | H  | 32.2571529 | 31.9321192 | 28.4010410 |
| H           | 39.4819951 | 35.0343691 | 24.4480138 | C  | 34.1434161 | 32.5165081 | 27.6149091 |
| H           | 39.3815327 | 37.5951266 | 24.9346411 | C  | 34.4489540 | 31.2776572 | 26.9062388 |
| H           | 33.9583757 | 40.1631390 | 29.6101575 | N  | 35.1354222 | 33.4436508 | 27.4282067 |
| H           | 36.3001155 | 40.5933273 | 28.4233265 | C  | 36.0451014 | 32.8440617 | 26.5894350 |
| H           | 30.7910530 | 35.9175169 | 30.4279855 | C  | 37.1936334 | 33.4808372 | 26.1302255 |
| H           | 30.9002350 | 33.3492993 | 29.6963897 | H  | 37.8668308 | 32.8903394 | 25.5152949 |
| H           | 34.0469158 | 30.3887575 | 26.6919097 | Fe | 35.0676708 | 35.4209461 | 27.9923120 |
| H           | 36.2578147 | 30.8936580 | 25.0832014 | C  | 35.6181715 | 31.4897504 | 26.2145081 |
|             |            |            |            | O  | 35.7941805 | 34.8413976 | 29.8734671 |
| <b>TS2'</b> |            |            |            | C  | 35.8336686 | 33.4105517 | 38.3886400 |
| S           | 34.3827358 | 35.8393807 | 25.7687777 | H  | 36.6791920 | 32.8067625 | 38.7480193 |
| N           | 36.8878658 | 35.7221445 | 27.0808448 | C  | 34.7022585 | 32.3583619 | 38.2927638 |
| C           | 37.5792957 | 34.8052557 | 26.3350870 | N  | 33.8205794 | 32.4216277 | 37.2721810 |
| C           | 37.5172795 | 36.9337136 | 26.9041591 | H  | 33.8470124 | 33.2208289 | 36.6418664 |
| C           | 38.7023620 | 35.4432549 | 25.6804497 | O  | 34.6356899 | 31.5307495 | 39.1889103 |
| C           | 38.6376534 | 36.7861749 | 25.9823477 | C  | 32.7491467 | 31.4482715 | 37.1789604 |
| C           | 37.1597181 | 38.0878864 | 27.6077072 | H  | 32.1309957 | 31.4704497 | 38.0899638 |
| H           | 37.8498259 | 38.9271847 | 27.5508968 | C  | 31.8112595 | 31.7815928 | 35.9894761 |
| C           | 36.0182001 | 38.2899131 | 28.3821679 | H  | 31.2334331 | 32.6721328 | 36.2797179 |

|   |            |            |            |   |            |            |            |
|---|------------|------------|------------|---|------------|------------|------------|
| H | 31.0978278 | 30.9474726 | 35.9122681 | H | 36.3645853 | 35.0537840 | 39.7185978 |
| C | 32.4973284 | 32.0364846 | 34.6642883 | N | 36.3410727 | 34.0592657 | 37.1524819 |
| C | 33.0719983 | 30.9861447 | 33.9218768 | C | 35.6900354 | 34.8771063 | 36.2894816 |
| C | 33.7636893 | 31.2297720 | 32.7418050 | O | 34.4761177 | 34.9829549 | 36.1860146 |
| H | 32.9883115 | 29.9606233 | 34.2889928 | H | 37.3493380 | 34.1797552 | 37.1516399 |
| C | 33.9269797 | 32.5414814 | 32.2612030 | C | 36.5876251 | 35.7170387 | 35.3208122 |
| H | 34.2004055 | 30.4175154 | 32.1573083 | H | 35.9971767 | 36.6301603 | 35.1707164 |
| C | 33.3233803 | 33.5973568 | 32.9627690 | C | 36.7433061 | 35.0282667 | 33.9550213 |
| C | 32.6180765 | 33.3351388 | 34.1436131 | C | 37.1030085 | 33.6172385 | 33.9130234 |
| H | 33.4141545 | 34.6227387 | 32.5944455 | C | 37.4956586 | 33.0131828 | 32.7635423 |
| H | 32.1720803 | 34.1757263 | 34.6820149 | H | 37.0483784 | 33.0432334 | 34.8410015 |
| O | 34.6773810 | 32.6906062 | 31.1487280 | C | 37.5535915 | 33.7559725 | 31.5025934 |
| H | 34.7743701 | 33.6137933 | 30.8208319 | H | 37.7614707 | 31.9558425 | 32.7188742 |
| C | 33.3390523 | 30.0235421 | 37.1036922 | C | 37.0650534 | 35.1788885 | 31.5261106 |
| O | 34.4352499 | 29.7718610 | 36.6547685 | C | 36.6430389 | 35.7445793 | 32.7701439 |
| O | 32.4629239 | 29.1449341 | 37.5803860 | H | 37.5090172 | 35.8534062 | 30.7961848 |
| C | 32.8156671 | 27.7394734 | 37.8874152 | H | 36.3989796 | 36.8092064 | 32.8009406 |
| C | 33.2071329 | 26.9953692 | 36.6076238 | O | 37.9489105 | 33.2503625 | 30.4565789 |
| H | 32.3987974 | 27.0784226 | 35.8640670 | H | 36.4628465 | 34.1866904 | 29.5881420 |
| H | 33.3584905 | 25.9290088 | 36.8360276 | N | 37.8902413 | 36.0747713 | 35.9304749 |
| H | 34.1324605 | 27.3995426 | 36.1780434 | C | 37.9428943 | 36.9157025 | 37.0369288 |
| C | 31.5301359 | 27.1666785 | 38.4778744 | O | 38.9762792 | 37.2822210 | 37.5620293 |
| H | 31.7025231 | 26.1283069 | 38.7981195 | O | 36.7184405 | 37.2644350 | 37.4817568 |
| H | 30.7223257 | 27.1712834 | 37.7359101 | C | 36.7153016 | 38.1662861 | 38.6296670 |
| H | 31.2095579 | 27.7597030 | 39.3473578 | H | 37.2023675 | 39.0994510 | 38.3084802 |
| C | 33.9277615 | 27.7195547 | 38.9301082 | H | 37.3359564 | 37.7292327 | 39.4248918 |
| H | 34.8661117 | 28.1298478 | 38.5376665 | C | 35.3136840 | 38.4283898 | 39.1160216 |
| H | 33.6428150 | 28.3098482 | 39.8135550 | C | 34.5004563 | 39.3716946 | 38.4670907 |
| H | 34.0869068 | 26.6789633 | 39.2458138 | H | 34.8972113 | 39.8923992 | 37.5924344 |
| C | 35.4900117 | 34.4295299 | 39.4818705 | C | 33.2233416 | 39.6733210 | 38.9488836 |
| H | 34.6615561 | 35.0825826 | 39.1732521 | C | 32.7331090 | 39.0267846 | 40.0916212 |
| H | 35.1965126 | 33.8835931 | 40.3893162 | H | 32.6063235 | 40.4278673 | 38.4550627 |

|            |            |            |            |    |            |            |            |
|------------|------------|------------|------------|----|------------|------------|------------|
| H          | 31.7387543 | 39.2768719 | 40.4725828 | C  | 37.1808912 | 37.9419879 | 27.1981540 |
| C          | 33.5342226 | 38.0810474 | 40.7439433 | H  | 37.8886581 | 38.7681918 | 27.1938769 |
| C          | 34.8178920 | 37.7920146 | 40.2655747 | C  | 36.0740282 | 38.1028314 | 28.0222911 |
| H          | 33.1654510 | 37.5774301 | 41.6416409 | N  | 35.0856639 | 37.1522444 | 28.2110361 |
| H          | 35.4439764 | 37.0804028 | 40.8094323 | C  | 34.1116485 | 37.7879415 | 28.9571702 |
| C          | 39.1614715 | 35.7825292 | 35.2652915 | C  | 34.4773259 | 39.1647487 | 29.2171260 |
| H          | 39.2407784 | 36.2928252 | 34.2910366 | C  | 35.7305784 | 39.3482320 | 28.6862399 |
| H          | 39.2958730 | 34.7021892 | 35.1040163 | C  | 32.9366013 | 37.1886694 | 29.4054705 |
| H          | 39.9664464 | 36.1442756 | 35.9146972 | H  | 32.2690235 | 37.8010683 | 30.0125561 |
| O          | 41.1633116 | 40.4920114 | 41.0440115 | C  | 32.5604840 | 35.8747504 | 29.1733325 |
| H          | 41.2603116 | 40.6340114 | 40.1880113 | C  | 31.3699124 | 35.2433910 | 29.7122995 |
| H          | 41.6963117 | 41.0770115 | 41.4110116 | C  | 32.6362935 | 33.7761968 | 28.5457943 |
| O          | 40.0103112 | 37.9030107 | 41.0350115 | N  | 33.3100289 | 34.9717464 | 28.4432298 |
| H          | 40.6103114 | 38.5330108 | 40.9750115 | C  | 31.4321954 | 33.9279503 | 29.3436232 |
| H          | 39.9303112 | 37.6180106 | 40.2140113 | C  | 33.0345110 | 32.5856151 | 27.9534853 |
| H          | 33.0132514 | 36.0044082 | 25.8091000 | H  | 32.3670770 | 31.7370242 | 28.1003997 |
| H          | 39.3992766 | 34.9795669 | 24.9823303 | C  | 34.1678332 | 32.3860746 | 27.1675688 |
| H          | 39.2869355 | 37.5159458 | 25.4986802 | C  | 34.4887583 | 31.1427112 | 26.4789459 |
| H          | 33.6867152 | 40.1648234 | 29.8146385 | N  | 35.1055597 | 33.3544885 | 26.9002735 |
| H          | 36.1944304 | 40.5042222 | 28.9644064 | C  | 36.0009959 | 32.7595182 | 26.0330068 |
| H          | 30.4639407 | 35.9256188 | 30.5611337 | C  | 37.1129127 | 33.4133596 | 25.5201445 |
| H          | 30.5952768 | 33.3472342 | 29.8444100 | H  | 37.7791678 | 32.8346345 | 24.8856099 |
| H          | 33.8684404 | 30.3607392 | 27.0078879 | Fe | 34.9565368 | 35.3322846 | 27.3345411 |
| H          | 36.1539789 | 30.8600896 | 25.5042231 | C  | 35.6196977 | 31.3774145 | 25.7320857 |
| <b>PC'</b> |            |            |            | O  | 36.4286689 | 35.8702689 | 31.2737659 |
| S          | 34.2517092 | 35.8075288 | 25.2058884 | C  | 35.8340068 | 33.3119828 | 38.9878978 |
| N          | 36.8065930 | 35.6361157 | 26.5070563 | H  | 36.6160233 | 32.6867295 | 39.4360680 |
| C          | 37.4988362 | 34.7338663 | 25.7422366 | C  | 34.7016336 | 32.2856165 | 38.7392581 |
| C          | 37.4890603 | 36.8319579 | 26.4106920 | N  | 33.9412840 | 32.3647020 | 37.6241877 |
| C          | 38.6580581 | 35.3649100 | 25.1493128 | H  | 34.0655897 | 33.1430444 | 36.9799752 |
| C          | 38.6288881 | 36.6927916 | 25.5153783 | O  | 34.5088622 | 31.4525144 | 39.6133069 |
|            |            |            |            | C  | 32.8796307 | 31.3967601 | 37.4317680 |

|   |            |            |            |   |            |            |            |
|---|------------|------------|------------|---|------------|------------|------------|
| H | 32.2828086 | 31.3267935 | 38.3534896 | C | 35.3860330 | 34.3242047 | 40.0496228 |
| C | 31.9034698 | 31.8150093 | 36.3022096 | H | 34.6097430 | 34.9977892 | 39.6598234 |
| H | 31.2425936 | 32.5851118 | 36.7240136 | H | 34.9851832 | 33.7747628 | 40.9115408 |
| H | 31.2711914 | 30.9379165 | 36.0981598 | H | 36.2410355 | 34.9279429 | 40.3897618 |
| C | 32.5293748 | 32.3502031 | 35.0307488 | N | 36.4997565 | 33.9697755 | 37.8403183 |
| C | 33.1456589 | 31.5103904 | 34.0860226 | C | 35.9544459 | 34.8258838 | 36.9437923 |
| C | 33.7353155 | 32.0230834 | 32.9304295 | O | 34.7561741 | 34.9483605 | 36.7258236 |
| H | 33.1789718 | 30.4325808 | 34.2680732 | H | 37.5019808 | 34.0781908 | 37.9629980 |
| C | 33.7370679 | 33.4059113 | 32.6916982 | C | 36.9442045 | 35.6782639 | 36.0995422 |
| H | 34.2231466 | 31.3708679 | 32.2020683 | H | 36.3844869 | 36.6117825 | 35.9610177 |
| C | 33.1278003 | 34.2580436 | 33.6190077 | C | 37.1665534 | 35.0929857 | 34.7111457 |
| C | 32.5263365 | 33.7282324 | 34.7638680 | C | 37.5440027 | 33.6834597 | 34.5357580 |
| H | 33.1231392 | 35.3388516 | 33.4524408 | C | 37.7487766 | 33.1106782 | 33.3224260 |
| H | 32.0494125 | 34.4147914 | 35.4681360 | H | 37.6114286 | 33.0615104 | 35.4332773 |
| O | 34.3332457 | 33.8545655 | 31.5485635 | C | 37.5340341 | 33.8782373 | 32.0938262 |
| H | 34.6042750 | 34.7840672 | 31.6321208 | H | 37.9628307 | 32.0450385 | 33.2164489 |
| C | 33.4717409 | 29.9857452 | 37.2391271 | C | 37.3330905 | 35.3943260 | 32.2468686 |
| O | 34.5967929 | 29.7616547 | 36.8504717 | C | 36.9987598 | 35.8733493 | 33.6212547 |
| O | 32.5570471 | 29.0762730 | 37.5712566 | H | 38.3563467 | 35.8071105 | 32.0511763 |
| C | 32.8792809 | 27.6573627 | 37.8274573 | H | 36.7012983 | 36.9214057 | 33.7141363 |
| C | 33.3690314 | 26.9853313 | 36.5417558 | O | 37.5103585 | 33.4054029 | 30.9693655 |
| H | 32.6360064 | 27.1439463 | 35.7351516 | H | 36.5610044 | 35.2786478 | 30.5088827 |
| H | 33.4798080 | 25.9029635 | 36.7081984 | N | 38.2074225 | 35.9928380 | 36.8010074 |
| H | 34.3351884 | 27.3960349 | 36.2240993 | C | 38.1893804 | 36.9338890 | 37.8088793 |
| C | 31.5490298 | 27.0667665 | 38.2846920 | O | 39.1835996 | 37.3825981 | 38.3521348 |
| H | 31.6778682 | 26.0046332 | 38.5408222 | O | 36.9312690 | 37.2898643 | 38.1263918 |
| H | 30.7973445 | 27.1491996 | 37.4912497 | C | 36.7866640 | 38.3149387 | 39.1422372 |
| H | 31.1760166 | 27.6039617 | 39.1691209 | H | 37.2162016 | 39.2438345 | 38.7380488 |
| C | 33.9047342 | 27.5739344 | 38.9512993 | H | 37.3889662 | 38.0233058 | 40.0121072 |
| H | 34.8683187 | 28.0074167 | 38.6578435 | C | 35.3320381 | 38.4965035 | 39.4901794 |
| H | 33.5480307 | 28.1136859 | 39.8411031 | C | 34.5370249 | 39.4113071 | 38.7800406 |
| H | 34.0426319 | 26.5171707 | 39.2200527 | H | 34.9839694 | 39.9730745 | 37.9549412 |

|            |            |            |            |    |            |            |            |
|------------|------------|------------|------------|----|------------|------------|------------|
| C          | 33.2046529 | 39.6362265 | 39.1395259 | C  | 37.4612585 | 36.8525740 | 26.4883020 |
| C          | 32.6392014 | 38.9333886 | 40.2113551 | C  | 38.6630063 | 35.3734252 | 25.2640091 |
| H          | 32.6018886 | 40.3753202 | 38.6059343 | C  | 38.6194480 | 36.7063512 | 25.6117850 |
| H          | 31.6054215 | 39.1336692 | 40.5071656 | C  | 37.1039472 | 37.9945517 | 27.2107796 |
| C          | 33.4165304 | 37.9996476 | 40.9098226 | H  | 37.8182395 | 38.8145236 | 27.2094804 |
| C          | 34.7542574 | 37.7884113 | 40.5556853 | C  | 35.9623660 | 38.1895052 | 27.9863462 |
| H          | 32.9865668 | 37.4518375 | 41.7526560 | N  | 34.9842882 | 37.2481103 | 28.2028659 |
| H          | 35.3609560 | 37.0912219 | 41.1381558 | C  | 34.0293223 | 37.8561112 | 28.9817252 |
| C          | 39.5116540 | 35.6206447 | 36.2562952 | C  | 34.3938582 | 39.2378945 | 29.2341039 |
| H          | 39.7178108 | 36.1254110 | 35.2972191 | C  | 35.6078743 | 39.4492929 | 28.6300485 |
| H          | 39.5798105 | 34.5348820 | 36.0973578 | C  | 32.8658270 | 37.2445986 | 29.4501529 |
| H          | 40.2789386 | 35.9203822 | 36.9791389 | H  | 32.2012395 | 37.8529515 | 30.0648239 |
| O          | 41.1633116 | 40.4920114 | 41.0440115 | C  | 32.4827530 | 35.9291610 | 29.2068705 |
| H          | 41.2603116 | 40.6340114 | 40.1880113 | C  | 31.2788984 | 35.2977929 | 29.7230810 |
| H          | 41.6963117 | 41.0770115 | 41.4110116 | C  | 32.5521909 | 33.8343237 | 28.5531689 |
| O          | 40.0103112 | 37.9030107 | 41.0350115 | N  | 33.2249131 | 35.0258657 | 28.4843150 |
| H          | 40.6103114 | 38.5330108 | 40.9750115 | C  | 31.3328658 | 33.9864386 | 29.3328415 |
| H          | 39.9303112 | 37.6180106 | 40.2140113 | C  | 32.9634895 | 32.6403459 | 27.9645820 |
| H          | 32.8981807 | 36.0034818 | 25.3900360 | H  | 32.2876199 | 31.7961111 | 28.0978068 |
| H          | 39.3694792 | 34.8925721 | 24.4719326 | C  | 34.1142300 | 32.4220922 | 27.2039606 |
| H          | 39.3203385 | 37.4280699 | 25.1038818 | C  | 34.4399056 | 31.1695015 | 26.5253712 |
| H          | 33.8114718 | 39.9361494 | 29.6039676 | N  | 35.0675219 | 33.3691925 | 26.9453961 |
| H          | 36.3373437 | 40.2508216 | 28.7585932 | C  | 35.9808103 | 32.7715742 | 26.1131252 |
| H          | 30.5691746 | 35.7166559 | 30.2805481 | C  | 37.1159623 | 33.4178269 | 25.6311872 |
| H          | 30.7579494 | 33.1225073 | 29.6346921 | H  | 37.7980945 | 32.8301464 | 25.0223249 |
| H          | 33.9535871 | 30.2058251 | 26.6335531 | Fe | 35.0017094 | 35.3299215 | 27.5179439 |
| H          | 36.1630095 | 30.7375117 | 25.0368133 | C  | 35.5912201 | 31.3896994 | 25.8050872 |
| <b>IM2</b> |            |            |            | O  | 35.8258304 | 34.8403216 | 29.3096587 |
| S          | 34.2088259 | 35.8332272 | 25.3986004 | C  | 35.8254501 | 33.2839337 | 38.9254739 |
| N          | 36.8003679 | 35.6512281 | 26.5963617 | H  | 36.6073942 | 32.6686683 | 39.3870398 |
| C          | 37.5007191 | 34.7397529 | 25.8537091 | C  | 34.7246241 | 32.2409573 | 38.6163898 |
|            |            |            |            | N  | 33.9104838 | 32.4206773 | 37.5493429 |

|   |            |            |            |   |            |            |            |
|---|------------|------------|------------|---|------------|------------|------------|
| H | 33.9952620 | 33.2805022 | 37.0057871 | H | 34.9218882 | 28.1113182 | 38.5031591 |
| O | 34.5899223 | 31.3106233 | 39.3975367 | H | 33.6997527 | 28.2082905 | 39.7870951 |
| C | 32.8343709 | 31.4738941 | 37.3233298 | H | 34.1563604 | 26.6141872 | 39.1294177 |
| H | 32.1897961 | 31.4134320 | 38.2131945 | C | 35.3218603 | 34.2694485 | 39.9878352 |
| C | 31.9130183 | 31.9194757 | 36.1540525 | H | 34.5379000 | 34.9291991 | 39.5897824 |
| H | 31.2449386 | 32.6965942 | 36.5495216 | H | 34.9152126 | 33.6983199 | 40.8332960 |
| H | 31.2824702 | 31.0494121 | 35.9116845 | H | 36.1526271 | 34.8882770 | 40.3585021 |
| C | 32.5849159 | 32.4430784 | 34.9091361 | N | 36.5042833 | 33.9701535 | 37.8030592 |
| C | 33.2994148 | 31.5847697 | 34.0230202 | C | 35.9726105 | 34.8124152 | 36.8898905 |
| C | 33.8875510 | 32.0712109 | 32.8785151 | O | 34.7754036 | 34.9329141 | 36.6490250 |
| H | 33.3857969 | 30.5253542 | 34.2738756 | H | 37.5065445 | 34.0726421 | 37.9315376 |
| C | 33.8252823 | 33.4849646 | 32.5398746 | C | 36.9726627 | 35.6504418 | 36.0466391 |
| H | 34.4295127 | 31.4241981 | 32.1845983 | H | 36.4179007 | 36.5849552 | 35.8863605 |
| C | 33.1102909 | 34.3428784 | 33.4664452 | C | 37.1956781 | 35.0265878 | 34.6736530 |
| C | 32.5025056 | 33.8254382 | 34.5893347 | C | 37.3863860 | 33.6287240 | 34.5018498 |
| H | 33.0761069 | 35.4101179 | 33.2401253 | C | 37.5560209 | 33.0854925 | 33.2466647 |
| H | 31.9489061 | 34.4938718 | 35.2542208 | H | 37.3750231 | 32.9745008 | 35.3774586 |
| O | 34.3755876 | 33.9362865 | 31.5040236 | C | 37.4985982 | 33.9160068 | 32.0534548 |
| H | 35.1751341 | 34.5966557 | 30.0050154 | H | 37.7011293 | 32.0134711 | 33.0976662 |
| C | 33.4050189 | 30.0517232 | 37.1306266 | C | 37.3209317 | 35.3457856 | 32.2587594 |
| O | 34.4756643 | 29.8222466 | 36.6099449 | C | 37.1882879 | 35.8648251 | 33.5285914 |
| O | 32.5400156 | 29.1588155 | 37.5911981 | H | 37.2674676 | 35.9800604 | 31.3717582 |
| C | 32.8789294 | 27.7360042 | 37.8322909 | H | 37.0514746 | 36.9414016 | 33.6625642 |
| C | 33.2687727 | 27.0469434 | 36.5222902 | O | 37.5742500 | 33.4110931 | 30.9066578 |
| H | 32.4803141 | 27.2061267 | 35.7705545 | H | 36.5971656 | 34.2605704 | 29.4875511 |
| H | 33.3733355 | 25.9647416 | 36.6950305 | N | 38.2298364 | 35.9710832 | 36.7515581 |
| H | 34.2169221 | 27.4363647 | 36.1320128 | C | 38.2096591 | 36.9109253 | 37.7628541 |
| C | 31.5881856 | 27.1494602 | 38.3960845 | O | 39.2028160 | 37.3436423 | 38.3188964 |
| H | 31.7544534 | 26.1016747 | 38.6876799 | O | 36.9514462 | 37.2771839 | 38.0712521 |
| H | 30.7852082 | 27.1793589 | 37.6496994 | C | 36.8106846 | 38.3092306 | 39.0841175 |
| H | 31.2648503 | 27.7170499 | 39.2811288 | H | 37.2335215 | 39.2364126 | 38.6692460 |
| C | 33.9883027 | 27.6694198 | 38.8730239 | H | 37.4208094 | 38.0270112 | 39.9522063 |

|   |            |            |            |    |            |            |            |
|---|------------|------------|------------|----|------------|------------|------------|
| C | 35.3591724 | 38.4922897 | 39.4447330 | S  | 34.2213912 | 35.8135263 | 25.3585219 |
| C | 34.5633108 | 39.4158665 | 38.7472713 | N  | 36.8047347 | 35.6854006 | 26.5849377 |
| H | 35.0062028 | 39.9775009 | 37.9202440 | C  | 37.5252237 | 34.7832312 | 25.8513006 |
| C | 33.2376673 | 39.6528002 | 39.1243474 | C  | 37.4530636 | 36.8942886 | 26.4915493 |
| C | 32.6794129 | 38.9523283 | 40.2015040 | C  | 38.6866790 | 35.4323085 | 25.2772510 |
| H | 32.6359715 | 40.4000450 | 38.6007631 | C  | 38.6227005 | 36.7636344 | 25.6274384 |
| H | 31.6518119 | 39.1633664 | 40.5121707 | C  | 37.0772738 | 38.0303127 | 27.2145862 |
| C | 33.4564247 | 38.0076704 | 40.8862160 | H  | 37.7839594 | 38.8567715 | 27.2198006 |
| C | 34.7880856 | 37.7862436 | 40.5156732 | C  | 35.9219552 | 38.2176032 | 27.9723937 |
| H | 33.0316636 | 37.4608927 | 41.7324542 | N  | 34.9496158 | 37.2679014 | 28.1743270 |
| H | 35.3959646 | 37.0828738 | 41.0898897 | C  | 33.9667537 | 37.8731116 | 28.9198065 |
| C | 39.5359136 | 35.5668325 | 36.2298596 | C  | 34.3038752 | 39.2646575 | 29.1578252 |
| H | 39.7695275 | 36.0629625 | 35.2728001 | C  | 35.5361270 | 39.4804860 | 28.5930557 |
| H | 39.5758634 | 34.4797818 | 36.0742596 | C  | 32.8075841 | 37.2454379 | 29.3767161 |
| H | 40.2977843 | 35.8513937 | 36.9644716 | H  | 32.1220047 | 37.8457464 | 29.9761600 |
| O | 41.1633116 | 40.4920114 | 41.0440115 | C  | 32.4592410 | 35.9175759 | 29.1515048 |
| H | 41.2603116 | 40.6340114 | 40.1880113 | C  | 31.2717758 | 35.2631273 | 29.6747079 |
| H | 41.6963117 | 41.0770115 | 41.4110116 | C  | 32.5833899 | 33.8158258 | 28.5277766 |
| O | 40.0103112 | 37.9030107 | 41.0350115 | N  | 33.2285899 | 35.0212720 | 28.4480667 |
| H | 40.6103114 | 38.5330108 | 40.9750115 | C  | 31.3588484 | 33.9479399 | 29.3023528 |
| H | 39.9303112 | 37.6180106 | 40.2140113 | C  | 33.0119242 | 32.6265297 | 27.9405994 |
| H | 32.8466166 | 36.0207286 | 25.5151189 | H  | 32.3418047 | 31.7764944 | 28.0660633 |
| H | 39.3750552 | 34.9060871 | 24.5838262 | C  | 34.1642986 | 32.4239288 | 27.1797866 |
| H | 39.3101796 | 37.4368422 | 25.1906674 | C  | 34.4943816 | 31.1827764 | 26.4823145 |
| H | 33.7564475 | 39.9932326 | 29.6937114 | N  | 35.1143168 | 33.3790979 | 26.9384054 |
| H | 36.1617938 | 40.3879120 | 28.6453672 | C  | 36.0296550 | 32.7966694 | 26.0973785 |
| H | 30.4839590 | 35.7631237 | 30.3058380 | C  | 37.1596498 | 33.4567551 | 25.6229415 |
| H | 30.6509396 | 33.1807450 | 29.6046899 | H  | 37.8503454 | 32.8787057 | 25.0145572 |
| H | 33.8892459 | 30.2394633 | 26.6663322 | Fe | 35.0099709 | 35.3452388 | 27.4983251 |
| H | 36.1438989 | 30.7471218 | 25.1197352 | C  | 35.6455598 | 31.4179998 | 25.7672799 |
|   |            |            |            | O  | 35.8747274 | 34.9387494 | 29.2842101 |
|   |            |            |            | C  | 35.7927456 | 33.3514833 | 39.0352000 |

**TS3**

|   |            |            |            |   |            |            |            |
|---|------------|------------|------------|---|------------|------------|------------|
| H | 36.5895558 | 32.7264766 | 39.4573093 | H | 30.9913271 | 27.2760269 | 37.3517911 |
| C | 34.7275945 | 32.3089523 | 38.6215994 | H | 31.4000516 | 27.8231723 | 38.9983555 |
| N | 33.9565750 | 32.5675845 | 37.5320873 | C | 34.1425800 | 27.8452888 | 38.6745542 |
| H | 33.9726358 | 33.5150424 | 37.1505268 | H | 35.0646391 | 28.3373868 | 38.3382985 |
| O | 34.6001689 | 31.2993083 | 39.2955170 | H | 33.8089394 | 28.3519843 | 39.5908560 |
| C | 32.9141638 | 31.6297425 | 37.1535215 | H | 34.3497893 | 26.7936108 | 38.9142665 |
| H | 32.1861449 | 31.5061166 | 37.9691701 | C | 35.2635630 | 34.2459135 | 40.1623586 |
| C | 32.1097020 | 32.1433859 | 35.9222495 | H | 34.4603043 | 34.9096306 | 39.8142008 |
| H | 31.3086432 | 32.7846169 | 36.3150701 | H | 34.8819644 | 33.6025022 | 40.9662274 |
| H | 31.6161699 | 31.2657725 | 35.4752336 | H | 36.0791753 | 34.8596796 | 40.5725816 |
| C | 32.8510968 | 32.9272562 | 34.8616086 | N | 36.4384355 | 34.1114529 | 37.9494784 |
| C | 33.7106305 | 32.2930006 | 33.8911248 | C | 35.8802130 | 35.0114197 | 37.1112707 |
| C | 34.4914954 | 33.0353973 | 32.9159426 | O | 34.6750596 | 35.2338900 | 37.0250521 |
| H | 33.8023519 | 31.2046145 | 33.9238057 | H | 37.4519422 | 34.0772839 | 37.9406865 |
| C | 34.0413147 | 34.4574740 | 32.6952188 | C | 36.8375862 | 35.7240390 | 36.1316206 |
| H | 34.6390200 | 32.5052626 | 31.9630745 | H | 36.3283334 | 36.6802211 | 35.9463370 |
| C | 33.2184254 | 35.0510212 | 33.7030541 | C | 36.8810201 | 34.9947314 | 34.7936860 |
| C | 32.6402762 | 34.2966250 | 34.7564111 | C | 36.4291627 | 33.7158834 | 34.6441755 |
| H | 33.0062427 | 36.1179042 | 33.6089531 | C | 36.2662532 | 33.1052798 | 33.3261697 |
| H | 31.9723951 | 34.8049305 | 35.4548871 | H | 36.0867818 | 33.1326499 | 35.5024050 |
| O | 34.4153899 | 35.1007003 | 31.6898113 | C | 36.9118487 | 33.7910501 | 32.1529552 |
| H | 35.2779049 | 35.0321218 | 30.0614416 | H | 36.4847704 | 32.0346790 | 33.2918985 |
| C | 33.5237165 | 30.2317190 | 36.9239888 | C | 37.3709717 | 35.1590025 | 32.3767767 |
| O | 34.5928880 | 30.0493942 | 36.3789697 | C | 37.3410132 | 35.7190713 | 33.6192459 |
| O | 32.6924834 | 29.3066083 | 37.3749113 | H | 37.7318033 | 35.7145409 | 31.5090039 |
| C | 33.0600690 | 27.8907247 | 37.6046309 | H | 37.6769661 | 36.7528332 | 33.7489486 |
| C | 33.5045701 | 27.2275274 | 36.2994635 | O | 36.9882066 | 33.2132107 | 31.0605992 |
| H | 32.7569513 | 27.4121586 | 35.5122793 | H | 36.4419962 | 34.1729732 | 29.5187772 |
| H | 33.5937087 | 26.1410544 | 36.4515800 | N | 38.1554397 | 36.0179884 | 36.7238385 |
| H | 34.4719445 | 27.6207439 | 35.9669446 | C | 38.2221689 | 36.9465659 | 37.7394319 |
| C | 31.7690442 | 27.2653926 | 38.1252919 | O | 39.2466128 | 37.3109580 | 38.2879444 |
| H | 31.9523054 | 26.2221202 | 38.4237809 | O | 36.9885643 | 37.3815750 | 38.0641641 |



C 36.8697279 38.3599661 39.1219527  
H 37.3083435 39.3013786 38.7583422  
H 37.4677418 38.0256826 39.9800235  
C 35.4128517 38.5363343 39.4718595  
C 34.6124292 39.4432600 38.7577136  
H 35.0595208 40.0104728 37.9368459  
C 33.2754777 39.6533185 39.1073467  
C 32.7083652 38.9420282 40.1730953  
H 32.6702302 40.3881821 38.5705045  
H 31.6719701 39.1377735 40.4654569  
C 33.4897388 38.0123559 40.8724951  
C 34.8331180 37.8163987 40.5273723  
H 33.0608254 37.4590884 41.7126223  
H 35.4426573 37.1226818 41.1112176  
C 39.4015193 35.4584502 36.2064055  
H 39.7316665 35.9550130 35.2780329  
H 39.2816075 34.3857412 35.9967522  
H 40.1820776 35.5965663 36.9646398  
O 41.1633116 40.4920114 41.0440115  
H 41.2603116 40.6340114 40.1880113  
H 41.6963117 41.0770115 41.4110116  
O 40.0103112 37.9030107 41.0350115  
H 40.6103114 38.5330108 40.9750115  
H 39.9303112 37.6180106 40.2140113  
H 32.8610481 36.0193176 25.4655913  
H 39.4120020 34.9771221 24.6028779  
H 39.3091070 37.5027961 25.2144576  
H 33.6294515 40.0216976 29.5579628  
H 36.0791410 40.4251966 28.6199787  
H 30.4660120 35.7155123 30.2527733  
H 30.6927300 33.1294299 29.5751070  
H 33.9435980 30.2500847 26.6039315

H 36.2014634 30.7880513 25.0728713  
  
**PC**  
S 34.2056386 35.8048978 25.3632883  
N 36.7877771 35.6732042 26.5877006  
C 37.5071417 34.7713302 25.8526343  
C 37.4382175 36.8812562 26.4969702  
C 38.6698667 35.4194718 25.2802480  
C 38.6084982 36.7502457 25.6334359  
C 37.0639278 38.0154617 27.2237226  
H 37.7716547 38.8410132 27.2309992  
C 35.9101122 38.2013923 27.9844134  
N 34.9357067 37.2529806 28.1835845  
C 33.9540124 37.8577166 28.9311346  
C 34.2956909 39.2468174 29.1764155  
C 35.5278274 39.4622641 28.6111646  
C 32.7898894 37.2326483 29.3797852  
H 32.1029365 37.8326847 29.9780536  
C 32.4374985 35.9072459 29.1467808  
C 31.2438929 35.2552974 29.6595297  
C 32.5639785 33.8046813 28.5264376  
N 33.2104633 35.0096644 28.4487512  
C 31.3342848 33.9389527 29.2923105  
C 32.9956709 32.6139546 27.9448402  
H 32.3269152 31.7631632 28.0715262  
C 34.1494572 32.4108133 27.1865389  
C 34.4816015 31.1683308 26.4928430  
N 35.0976832 33.3672166 26.9423139  
C 36.0128163 32.7843155 26.1009366  
C 37.1410377 33.4450480 25.6235876  
H 37.8307739 32.8674043 25.0136798

|    |            |            |            |   |            |            |            |
|----|------------|------------|------------|---|------------|------------|------------|
| Fe | 34.9912910 | 35.3343259 | 27.5001638 | H | 33.5348559 | 26.0947375 | 36.5611777 |
| C  | 35.6309406 | 31.4041786 | 25.7750454 | H | 34.4302798 | 27.5604203 | 36.0693218 |
| O  | 35.8636302 | 34.9235695 | 29.2831715 | C | 31.6975566 | 27.2530631 | 38.1974077 |
| C  | 35.7622898 | 33.3424506 | 39.0687013 | H | 31.8625669 | 26.2073277 | 38.4972604 |
| H  | 36.5460421 | 32.7082668 | 39.5011431 | H | 30.9304404 | 27.2745320 | 37.4139565 |
| C  | 34.6801392 | 32.3113460 | 38.6704751 | H | 31.3247331 | 27.8164116 | 39.0652477 |
| N  | 33.9370465 | 32.5415617 | 37.5549258 | C | 34.0696261 | 27.8074746 | 38.7769124 |
| H  | 33.9576307 | 33.4791450 | 37.1506791 | H | 35.0073038 | 28.2749138 | 38.4496084 |
| O  | 34.5195259 | 31.3292863 | 39.3775253 | H | 33.7324528 | 28.3314951 | 39.6823934 |
| C  | 32.8949579 | 31.5968782 | 37.1914294 | H | 34.2527983 | 26.7546754 | 39.0322656 |
| H  | 32.1625107 | 31.4960569 | 38.0062717 | C | 35.2492135 | 34.2620657 | 40.1824918 |
| C  | 32.0950337 | 32.0758057 | 35.9428328 | H | 34.4408580 | 34.9180497 | 39.8307806 |
| H  | 31.2737191 | 32.7023497 | 36.3151950 | H | 34.8803449 | 33.6366861 | 41.0060154 |
| H  | 31.6280902 | 31.1807629 | 35.5004630 | H | 36.0710555 | 34.8836439 | 40.5676143 |
| C  | 32.8286929 | 32.8637499 | 34.8791309 | N | 36.4278260 | 34.0754409 | 37.9772132 |
| C  | 33.7818356 | 32.2407187 | 33.9810346 | C | 35.8878025 | 34.9783589 | 37.1307174 |
| C  | 34.5878747 | 32.9960464 | 32.9769431 | O | 34.6868664 | 35.2109221 | 37.0291751 |
| H  | 33.9534329 | 31.1657813 | 34.0816855 | H | 37.4409792 | 34.0318230 | 37.9830020 |
| C  | 34.0485058 | 34.4033616 | 32.7165241 | C | 36.8652470 | 35.6754087 | 36.1585124 |
| H  | 34.6074225 | 32.4556498 | 32.0124157 | H | 36.3640354 | 36.6329246 | 35.9550763 |
| C  | 33.1350622 | 34.9635676 | 33.6567007 | C | 36.9134246 | 34.9354512 | 34.8266752 |
| C  | 32.5373145 | 34.2038705 | 34.7149486 | C | 36.3678395 | 33.7069876 | 34.6632315 |
| H  | 32.8706859 | 36.0139640 | 33.5202531 | C | 36.1705513 | 33.0865106 | 33.3254623 |
| H  | 31.8030037 | 34.6955695 | 35.3565537 | H | 35.9605881 | 33.1520451 | 35.5118853 |
| O  | 34.4414476 | 35.0481680 | 31.7198927 | C | 36.8934592 | 33.7596146 | 32.1637068 |
| H  | 35.2780067 | 35.0098127 | 30.0696106 | H | 36.5092372 | 32.0414038 | 33.3266077 |
| C  | 33.5036870 | 30.1910286 | 37.0059977 | C | 37.4442236 | 35.0941563 | 32.4111043 |
| O  | 34.5887926 | 29.9916761 | 36.5008787 | C | 37.4407647 | 35.6376888 | 33.6558329 |
| O  | 32.6521742 | 29.2773146 | 37.4433547 | H | 37.8489608 | 35.6328652 | 31.5521068 |
| C  | 33.0027659 | 27.8599503 | 37.6913696 | H | 37.8453324 | 36.6449523 | 33.8001482 |
| C  | 33.4560851 | 27.1803437 | 36.3972819 | O | 36.9703988 | 33.1880508 | 31.0764863 |
| H  | 32.7177347 | 27.3624448 | 35.6007063 | H | 36.4224590 | 34.1468910 | 29.4894768 |

|   |            |            |            |   |            |            |            |
|---|------------|------------|------------|---|------------|------------|------------|
| N | 38.1760252 | 35.9668166 | 36.7627246 | H | 36.0736204 | 40.4052827 | 28.6410482 |
| C | 38.2385103 | 36.9116872 | 37.7631477 | H | 30.4325263 | 35.7095488 | 30.2282185 |
| O | 39.2628931 | 37.2804268 | 38.3089405 | H | 30.6661371 | 33.1214311 | 29.5630579 |
| O | 37.0051279 | 37.3559723 | 38.0738427 | H | 33.9330653 | 30.2349442 | 26.6191948 |
| C | 36.8834402 | 38.3650727 | 39.1030841 | H | 36.1867340 | 30.7730590 | 25.0816128 |
| H | 37.3098813 | 39.2987784 | 38.7068869 |   |            |            |            |
| H | 37.4905528 | 38.0619167 | 39.9662599 |   |            |            |            |
| C | 35.4272504 | 38.5404950 | 39.4566413 |   |            |            |            |
| C | 34.6251148 | 39.4450135 | 38.7418213 |   |            |            |            |
| H | 35.0711954 | 40.0104293 | 37.9192752 |   |            |            |            |
| C | 33.2885307 | 39.6556490 | 39.0932699 |   |            |            |            |
| C | 32.7235946 | 38.9455373 | 40.1606897 |   |            |            |            |
| H | 32.6819692 | 40.3891650 | 38.5559577 |   |            |            |            |
| H | 31.6872503 | 39.1401463 | 40.4536468 |   |            |            |            |
| C | 33.5068108 | 38.0183598 | 40.8614435 |   |            |            |            |
| C | 34.8500851 | 37.8238517 | 40.5160613 |   |            |            |            |
| H | 33.0791397 | 37.4657955 | 41.7026577 |   |            |            |            |
| H | 35.4608077 | 37.1325767 | 41.1014602 |   |            |            |            |
| C | 39.4238918 | 35.3781834 | 36.2838900 |   |            |            |            |
| H | 39.8196513 | 35.8962295 | 35.3934192 |   |            |            |            |
| H | 39.2673927 | 34.3210990 | 36.0269376 |   |            |            |            |
| H | 40.1737089 | 35.4521192 | 37.0816232 |   |            |            |            |
| O | 41.1633116 | 40.4920114 | 41.0440115 |   |            |            |            |
| H | 41.2603116 | 40.6340114 | 40.1880113 |   |            |            |            |
| H | 41.6963117 | 41.0770115 | 41.4110116 |   |            |            |            |
| O | 40.0103112 | 37.9030107 | 41.0350115 |   |            |            |            |
| H | 40.6103114 | 38.5330108 | 40.9750115 |   |            |            |            |
| H | 39.9303112 | 37.6180106 | 40.2140113 |   |            |            |            |
| H | 32.8457541 | 36.0142464 | 25.4692820 |   |            |            |            |
| H | 39.3944857 | 34.9625661 | 24.6062809 |   |            |            |            |
| H | 39.2973123 | 37.4885278 | 25.2228974 |   |            |            |            |
| H | 33.6236951 | 40.0029596 | 29.5822944 |   |            |            |            |
